# Supplementary material for: C–H activation on a diphosphine and hydrido-bridged diiridium complex: generation and detection of an active IrII–IrII species [(Cp*Ir)2(μ-dmpm)(μ-H)]+
Source: Royal Society of Chemistry journal article supplement (doi:10.1039/b803626h), 2008-01-01
Supplement: b803626h.pdf [file b803626h.pdf]

# **C-H activation on a diphosphine and hydrido-bridged diiridium complex. Generation and detection of an active Ir<sup>II</sup>-Ir<sup>II</sup> species [(Cp\*Ir)<sub>2</sub>(μ-dmpm)(μ-H)]<sup>+</sup>**

Yoshinori Takahashi,<sup>a</sup> Mitsuru Nonogawa,<sup>a</sup> Ken-ichi Fujita<sup>\*,a,b</sup> and Ryohei Yamaguchi<sup>\*,a</sup>

<sup>a</sup>Graduate School of Human and Environmental Studies, and <sup>b</sup>Graduate School of Global Environmental Studies, Kyoto University, Sakyo-ku, Kyoto 606-8501, Japan

fujitak@kagaku.mbox.media.kyoto-u.ac.jp; yama@kagaku.mbox.media.kyoto-u.ac.jp

**Electronic Supplementary Information: List of crystal data and structure refinement, atomic coordinates, bond lengths, angles etc.**

|                                                                                                               |    |
|---------------------------------------------------------------------------------------------------------------|----|
| Tables for [(Cp*Ir) <sub>2</sub> (μ-dmpm)(μ-H) <sub>2</sub> ] ( <b>3</b> )                                    | 2  |
| Tables for [(Cp*Ir)(H)(μ-Me <sub>2</sub> PCH <sub>2</sub> PMeCH <sub>2</sub> )(μ-H)(IrCp*)][OTf] ( <b>8</b> ) | 17 |
| Tables for [(Cp*Ir)(H)(μ-dmpm)(μ-C <sub>3</sub> H <sub>4</sub> N)(H)(IrCp*)][OTf] ( <b>12</b> )               | 33 |

**Details of the X-ray crystal structures for complex 3**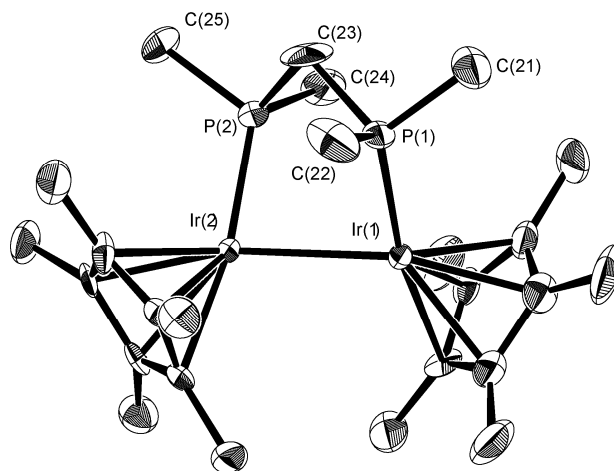

## A. Crystal Data

|                                       |                               |
|---------------------------------------|-------------------------------|
| Empirical Formula                     | $C_{25}H_{46}Ir_2P_2$         |
| Formula Weight                        | 793.03                        |
| Crystal Color, Habit                  | orange, block                 |
| Crystal Dimensions                    | 0.60 X 0.50 X 0.30 mm         |
| Crystal System                        | monoclinic                    |
| Lattice Type                          | Primitive                     |
| No. of Reflections Used for Unit      |                               |
| Cell Determination ( $2\theta$ range) | 24 ( 29.5 - 29.9 $^\circ$ )   |
| Omega Scan Peak Width                 |                               |
| at Half-height                        | 0.17 $^\circ$                 |
| Lattice Parameters                    |                               |
|                                       | a = 8.505(6) Å                |
|                                       | b = 16.341(7) Å               |
|                                       | c = 20.088(4) Å               |
|                                       | $\beta$ = 96.95(3) $^\circ$   |
|                                       | V = 2771.2(23) Å <sup>3</sup> |
| Space Group                           | P2 <sub>1</sub> /c (#14)      |
| Z value                               | 4                             |
| D <sub>calc</sub>                     | 1.901 g/cm <sup>3</sup>       |
| F <sub>000</sub>                      | 1520.00                       |

$\mu(\text{MoK}\alpha)$  97.461 cm<sup>-1</sup>

#### B. Intensity Measurements

|                              |                                                                            |
|------------------------------|----------------------------------------------------------------------------|
| Diffractometer               | Rigaku AFC5S                                                               |
| Radiation                    | MoK $\alpha$ ( $\lambda = 0.71069 \text{ \AA}$ )<br>graphite monochromated |
| Attenuator                   | Zr foil (factors = 1.00, 2.24, 5.29, 11.80)                                |
| Take-off Angle               | 6.0°                                                                       |
| Detector Aperture            | 13.0 mm horizontal<br>9.0 mm vertical                                      |
| Crystal to Detector Distance | 258 mm                                                                     |
| Voltage, Current             | 50 kV, 20 mA                                                               |
| Temperature                  | -70.0°C                                                                    |
| Scan Type                    | $\omega$ -2 $\theta$                                                       |
| Scan Rate                    | 2.0°/min (in $\omega$ )                                                    |
| Scan Width                   | (1.26 + 0.30 tan $\theta$ )°                                               |
| 2 $\theta_{\text{max}}$      | 55.0°                                                                      |
| No. of Reflections Measured  | Total: 6744<br>Unique: 6213 ( $R_{\text{int}} = 0.064$ )                   |
| Corrections                  | Lorentz-polarization<br>Absorption<br>(trans. factors: 0.023 - 0.054)      |

#### C. Structure Solution and Refinement

|                                          |                                                                                       |
|------------------------------------------|---------------------------------------------------------------------------------------|
| Structure Solution                       | Patterson Methods (DIRDIF99 PATTY)                                                    |
| Refinement                               | Full-matrix least-squares on F                                                        |
| Function Minimized                       | $\Sigma w ( F_o  -  F_c )^2$                                                          |
| Least Squares Weights                    | 1/[0.0048F <sub>o</sub> <sup>2</sup> +1.0000 $\sigma$ (F <sub>o</sub> <sup>2</sup> )] |
| 2 $\theta_{\text{max}}$ cutoff           | 55.0°                                                                                 |
| Anomalous Dispersion                     | All non-hydrogen atoms                                                                |
| No. Observations ( $I > 3.00\sigma(I)$ ) | 5326                                                                                  |
| No. Variables                            | 306                                                                                   |
| Reflection/Parameter Ratio               | 17.41                                                                                 |

|                                       |                                  |
|---------------------------------------|----------------------------------|
| Residuals: R ( $I > 3.00\sigma(I)$ )  | 0.0447                           |
| Residuals: Rw ( $I > 3.00\sigma(I)$ ) | 0.0738                           |
| Goodness of Fit Indicator             | 1.004                            |
| Max Shift/Error in Final Cycle        | 0.000                            |
| Maximum peak in Final Diff. Map       | $3.54 \text{ e}^-/\text{\AA}^3$  |
| Minimum peak in Final Diff. Map       | $-4.36 \text{ e}^-/\text{\AA}^3$ |

Table 1. Atomic coordinates and  $B_{\text{iso}}/B_{\text{eq}}$ 

| atom  | x          | y           | z            | $B_{\text{eq}}$ |
|-------|------------|-------------|--------------|-----------------|
| Ir(1) | 0.79117(3) | 0.74445(2)  | 0.424620(10) | 1.450(7)        |
| Ir(2) | 0.59345(3) | 0.81746(2)  | 0.322460(10) | 1.379(7)        |
| P(1)  | 0.9088(2)  | 0.68521(13) | 0.34563(12)  | 1.98(4)         |
| P(2)  | 0.5846(2)  | 0.69586(13) | 0.27593(12)  | 2.20(4)         |
| C(1)  | 0.7502(10) | 0.6449(6)   | 0.5012(4)    | 2.49(17)        |
| C(2)  | 0.6148(10) | 0.6948(5)   | 0.4940(4)    | 2.19(17)        |
| C(3)  | 0.6544(11) | 0.7756(6)   | 0.5116(4)    | 2.59(18)        |
| C(4)  | 0.8189(13) | 0.7778(6)   | 0.5337(5)    | 3.2(2)          |
| C(5)  | 0.8837(11) | 0.6976(6)   | 0.5269(5)    | 2.9(2)          |
| C(6)  | 0.7582(18) | 0.5544(6)   | 0.4957(5)    | 4.9(3)          |
| C(7)  | 0.4463(13) | 0.6651(8)   | 0.4782(5)    | 4.3(2)          |
| C(8)  | 0.5390(14) | 0.8436(7)   | 0.5157(5)    | 3.9(2)          |
| C(9)  | 0.9129(16) | 0.8475(8)   | 0.5629(5)    | 4.7(3)          |
| C(10) | 1.0436(17) | 0.6682(10)  | 0.5505(6)    | 5.7(3)          |
| C(11) | 0.4697(8)  | 0.9386(4)   | 0.3212(4)    | 1.75(14)        |
| C(12) | 0.4652(10) | 0.9092(4)   | 0.2530(4)    | 2.12(15)        |
| C(13) | 0.6308(10) | 0.9068(5)   | 0.2389(4)    | 2.52(18)        |
| C(14) | 0.7287(9)  | 0.9333(4)   | 0.2958(4)    | 1.98(15)        |
| C(15) | 0.6281(9)  | 0.9518(4)   | 0.3476(4)    | 1.82(14)        |
| C(16) | 0.3296(11) | 0.9567(6)   | 0.3572(5)    | 3.1(2)          |
| C(17) | 0.3201(12) | 0.8965(6)   | 0.2036(5)    | 3.2(2)          |
| C(18) | 0.6770(14) | 0.8925(7)   | 0.1700(5)    | 4.1(2)          |
| C(19) | 0.9010(11) | 0.9525(6)   | 0.3005(5)    | 3.2(2)          |
| C(20) | 0.6940(12) | 0.9924(6)   | 0.4123(5)    | 3.4(2)          |
| C(21) | 1.0260(14) | 0.5937(7)   | 0.3671(5)    | 3.9(2)          |
| C(22) | 1.0577(17) | 0.7436(7)   | 0.3089(7)    | 4.7(3)          |
| C(23) | 0.7765(14) | 0.6481(7)   | 0.2702(5)    | 4.1(2)          |
| C(24) | 0.4858(16) | 0.6131(6)   | 0.3159(6)    | 4.4(2)          |
| C(25) | 0.4956(19) | 0.6877(7)   | 0.1884(6)    | 5.1(3)          |

$$B_{eq} = 8/3 \pi^2(U_{11}(aa^*)^2 + U_{22}(bb^*)^2 + U_{33}(cc^*)^2 + 2U_{12}(aa^*bb^*)\cos \gamma + 2U_{13}(aa^*cc^*)\cos \beta + 2U_{23}(bb^*cc^*)\cos \alpha)$$

Table 2. Atomic coordinates and  $B_{\text{iso}}$  involving hydrogens/ $B_{\text{eq}}$ 

| atom  | x      | y      | z      | $B_{\text{eq}}$ |
|-------|--------|--------|--------|-----------------|
| H(1)  | 0.6578 | 0.5331 | 0.4779 | 5.96            |
| H(2)  | 0.7889 | 0.5315 | 0.5388 | 5.95            |
| H(3)  | 0.8345 | 0.5406 | 0.4667 | 5.96            |
| H(4)  | 0.3743 | 0.7093 | 0.4798 | 5.32            |
| H(5)  | 0.4269 | 0.6252 | 0.5107 | 5.32            |
| H(6)  | 0.4323 | 0.6411 | 0.4349 | 5.32            |
| H(7)  | 0.5931 | 0.8910 | 0.5338 | 4.86            |
| H(8)  | 0.4623 | 0.8275 | 0.5438 | 4.86            |
| H(9)  | 0.4878 | 0.8555 | 0.4721 | 4.86            |
| H(10) | 1.0188 | 0.8306 | 0.5764 | 5.56            |
| H(11) | 0.8676 | 0.8675 | 0.6007 | 5.56            |
| H(12) | 0.9124 | 0.8896 | 0.5303 | 5.56            |
| H(13) | 1.0501 | 0.6111 | 0.5424 | 6.68            |
| H(14) | 1.0667 | 0.6784 | 0.5972 | 6.68            |
| H(15) | 1.1179 | 0.6962 | 0.5271 | 6.68            |
| H(16) | 0.2346 | 0.9452 | 0.3287 | 3.80            |
| H(17) | 0.3313 | 1.0128 | 0.3695 | 3.81            |
| H(18) | 0.3342 | 0.9237 | 0.3963 | 3.80            |
| H(19) | 0.3493 | 0.8796 | 0.1615 | 3.74            |
| H(20) | 0.2623 | 0.9463 | 0.1981 | 3.74            |
| H(21) | 0.2562 | 0.8555 | 0.2203 | 3.74            |
| H(22) | 0.7890 | 0.8959 | 0.1723 | 4.86            |
| H(23) | 0.6299 | 0.9330 | 0.1400 | 4.86            |
| H(24) | 0.6428 | 0.8398 | 0.1543 | 4.86            |
| H(25) | 0.9348 | 0.9756 | 0.3432 | 3.86            |
| H(26) | 0.9192 | 0.9905 | 0.2664 | 3.85            |
| H(27) | 0.9589 | 0.9037 | 0.2951 | 3.86            |
| H(28) | 0.6103 | 1.0030 | 0.4384 | 3.98            |
| H(29) | 0.7434 | 1.0425 | 0.4028 | 3.98            |
| H(30) | 0.7696 | 0.9574 | 0.4365 | 3.98            |

|       |        |        |        |      |
|-------|--------|--------|--------|------|
| H(31) | 1.1325 | 0.6084 | 0.3821 | 4.85 |
| H(32) | 1.0235 | 0.5599 | 0.3285 | 4.84 |
| H(33) | 0.9826 | 0.5648 | 0.4016 | 4.85 |
| H(34) | 1.0086 | 0.7732 | 0.2713 | 5.93 |
| H(35) | 1.1347 | 0.7074 | 0.2949 | 5.93 |
| H(36) | 1.1075 | 0.7808 | 0.3412 | 5.93 |
| H(37) | 0.8166 | 0.6657 | 0.2304 | 5.02 |
| H(38) | 0.7681 | 0.5901 | 0.2700 | 5.00 |
| H(39) | 0.5602 | 0.5858 | 0.3474 | 5.25 |
| H(40) | 0.4415 | 0.5752 | 0.2830 | 5.24 |
| H(41) | 0.4039 | 0.6358 | 0.3384 | 5.25 |
| H(42) | 0.3852 | 0.6775 | 0.1867 | 5.72 |
| H(43) | 0.5443 | 0.6438 | 0.1675 | 5.72 |
| H(44) | 0.5119 | 0.7373 | 0.1655 | 5.72 |

$$B_{eq} = \frac{8}{3} \pi^2 (U_{11}(aa^*)^2 + U_{22}(bb^*)^2 + U_{33}(cc^*)^2 + 2U_{12}(aa^*bb^*)\cos \gamma + 2U_{13}(aa^*cc^*)\cos \beta + 2U_{23}(bb^*cc^*)\cos \alpha)$$



Table 3. Anisotropic displacement parameters

| atom  | U <sub>11</sub> | U <sub>22</sub> | U <sub>33</sub> | U <sub>12</sub> | U <sub>13</sub> | U <sub>23</sub> |
|-------|-----------------|-----------------|-----------------|-----------------|-----------------|-----------------|
| Ir(1) | 0.0207(2)       | 0.01969(19)     | 0.0145(2)       | 0.00453(10)     | 0.00120(13)     | -0.00027(10)    |
| Ir(2) | 0.02192(19)     | 0.01628(18)     | 0.01343(19)     | 0.00029(10)     | -0.00094(12)    | -0.00016(10)    |
| P(1)  | 0.0269(10)      | 0.0256(10)      | 0.0242(11)      | 0.0063(7)       | 0.0098(8)       | -0.0022(8)      |
| P(2)  | 0.0364(11)      | 0.0226(9)       | 0.0228(11)      | 0.0019(8)       | -0.0037(9)      | -0.0053(8)      |
| C(1)  | 0.033(4)        | 0.040(4)        | 0.020(4)        | 0.008(3)        | -0.002(3)       | 0.005(3)        |
| C(2)  | 0.031(4)        | 0.037(4)        | 0.016(4)        | 0.000(3)        | 0.008(3)        | 0.009(3)        |
| C(3)  | 0.043(5)        | 0.044(5)        | 0.014(4)        | 0.010(4)        | 0.019(3)        | -0.007(3)       |
| C(4)  | 0.060(6)        | 0.035(5)        | 0.025(5)        | -0.001(4)       | 0.001(4)        | 0.003(4)        |
| C(5)  | 0.027(4)        | 0.048(5)        | 0.035(5)        | 0.011(3)        | 0.004(3)        | 0.002(4)        |
| C(6)  | 0.111(10)       | 0.045(6)        | 0.033(5)        | 0.022(6)        | 0.025(6)        | 0.021(5)        |
| C(7)  | 0.048(6)        | 0.087(8)        | 0.034(6)        | -0.017(6)       | 0.018(4)        | 0.010(6)        |
| C(8)  | 0.065(7)        | 0.058(6)        | 0.031(5)        | 0.026(5)        | 0.021(5)        | 0.005(5)        |
| C(9)  | 0.076(8)        | 0.074(8)        | 0.026(5)        | -0.007(7)       | -0.009(5)       | -0.008(5)       |
| C(10) | 0.072(8)        | 0.113(12)       | 0.027(6)        | 0.044(8)        | -0.007(5)       | 0.016(6)        |
| C(11) | 0.017(3)        | 0.014(3)        | 0.035(4)        | 0.007(2)        | 0.001(2)        | 0.008(3)        |
| C(12) | 0.037(4)        | 0.015(3)        | 0.027(4)        | 0.006(3)        | -0.006(3)       | 0.011(3)        |
| C(13) | 0.036(4)        | 0.035(4)        | 0.024(4)        | 0.006(3)        | 0.002(3)        | 0.015(3)        |
| C(14) | 0.033(4)        | 0.016(3)        | 0.026(4)        | 0.001(3)        | 0.000(3)        | 0.002(3)        |
| C(15) | 0.031(3)        | 0.011(3)        | 0.026(4)        | 0.001(2)        | 0.002(3)        | 0.002(2)        |
| C(16) | 0.042(5)        | 0.037(5)        | 0.041(5)        | 0.004(4)        | 0.012(4)        | 0.002(4)        |
| C(17) | 0.044(5)        | 0.045(5)        | 0.030(5)        | 0.001(4)        | -0.015(4)       | 0.005(4)        |
| C(18) | 0.063(7)        | 0.057(6)        | 0.033(5)        | 0.018(5)        | 0.004(5)        | 0.008(5)        |
| C(19) | 0.037(4)        | 0.039(5)        | 0.045(6)        | -0.004(4)       | 0.009(4)        | 0.003(4)        |
| C(20) | 0.052(5)        | 0.038(5)        | 0.036(5)        | 0.014(4)        | -0.015(4)       | -0.012(4)       |
| C(21) | 0.063(6)        | 0.048(6)        | 0.042(6)        | 0.023(5)        | 0.024(5)        | 0.008(5)        |
| C(22) | 0.075(8)        | 0.038(6)        | 0.074(9)        | 0.007(5)        | 0.049(7)        | 0.007(5)        |
| C(23) | 0.065(7)        | 0.056(6)        | 0.038(6)        | 0.012(5)        | 0.020(5)        | -0.030(5)       |
| C(24) | 0.097(9)        | 0.027(5)        | 0.043(6)        | -0.021(5)       | -0.001(6)       | -0.007(4)       |
| C(25) | 0.101(10)       | 0.045(6)        | 0.036(6)        | 0.002(6)        | -0.040(7)       | -0.016(4)       |

The general temperature factor expression:  $\exp(-2\pi^2(a^2U_{11}h^2 + b^2U_{22}k^2 + c^2U_{33}l^2 + 2a*b*U_{12}hk + 2a*c*U_{13}hl + 2b*c*U_{23}kl))$

Table 4. Bond lengths (Å)

| atom  | atom  | distance  | atom  | atom  | distance  |
|-------|-------|-----------|-------|-------|-----------|
| Ir(1) | Ir(2) | 2.7618(3) | Ir(1) | P(1)  | 2.200(2)  |
| Ir(1) | C(1)  | 2.295(9)  | Ir(1) | C(2)  | 2.314(9)  |
| Ir(1) | C(3)  | 2.271(9)  | Ir(1) | C(4)  | 2.243(10) |
| Ir(1) | C(5)  | 2.244(10) | Ir(2) | P(2)  | 2.193(2)  |
| Ir(2) | C(11) | 2.241(7)  | Ir(2) | C(12) | 2.239(7)  |
| Ir(2) | C(13) | 2.276(9)  | Ir(2) | C(14) | 2.311(8)  |
| Ir(2) | C(15) | 2.263(7)  | P(1)  | C(21) | 1.819(11) |
| P(1)  | C(22) | 1.812(14) | P(1)  | C(23) | 1.876(11) |
| P(2)  | C(23) | 1.825(12) | P(2)  | C(24) | 1.828(12) |
| P(2)  | C(25) | 1.834(12) | C(1)  | C(2)  | 1.405(12) |
| C(1)  | C(5)  | 1.469(13) | C(1)  | C(6)  | 1.485(14) |
| C(2)  | C(3)  | 1.397(13) | C(2)  | C(7)  | 1.510(14) |
| C(3)  | C(4)  | 1.416(14) | C(3)  | C(8)  | 1.492(16) |
| C(4)  | C(5)  | 1.434(14) | C(4)  | C(9)  | 1.471(17) |
| C(5)  | C(10) | 1.466(17) | C(11) | C(12) | 1.449(12) |
| C(11) | C(15) | 1.404(10) | C(11) | C(16) | 1.496(13) |
| C(12) | C(13) | 1.470(12) | C(12) | C(17) | 1.501(12) |
| C(13) | C(14) | 1.398(11) | C(13) | C(18) | 1.502(15) |
| C(14) | C(15) | 1.457(12) | C(14) | C(19) | 1.491(12) |
| C(15) | C(20) | 1.506(12) |       |       |           |

Table 5. Bond lengths involving hydrogens (Å)

| atom  | atom  | distance | atom  | atom  | distance |
|-------|-------|----------|-------|-------|----------|
| C(6)  | H(1)  | 0.950    | C(6)  | H(2)  | 0.950    |
| C(6)  | H(3)  | 0.950    | C(7)  | H(4)  | 0.950    |
| C(7)  | H(5)  | 0.950    | C(7)  | H(6)  | 0.950    |
| C(8)  | H(7)  | 0.950    | C(8)  | H(8)  | 0.950    |
| C(8)  | H(9)  | 0.950    | C(9)  | H(10) | 0.950    |
| C(9)  | H(11) | 0.950    | C(9)  | H(12) | 0.950    |
| C(10) | H(13) | 0.950    | C(10) | H(14) | 0.950    |
| C(10) | H(15) | 0.950    | C(16) | H(16) | 0.950    |
| C(16) | H(17) | 0.950    | C(16) | H(18) | 0.950    |
| C(17) | H(19) | 0.950    | C(17) | H(20) | 0.950    |
| C(17) | H(21) | 0.950    | C(18) | H(22) | 0.950    |
| C(18) | H(23) | 0.950    | C(18) | H(24) | 0.950    |
| C(19) | H(25) | 0.950    | C(19) | H(26) | 0.950    |
| C(19) | H(27) | 0.950    | C(20) | H(28) | 0.950    |
| C(20) | H(29) | 0.950    | C(20) | H(30) | 0.950    |
| C(21) | H(31) | 0.950    | C(21) | H(32) | 0.950    |
| C(21) | H(33) | 0.950    | C(22) | H(34) | 0.950    |
| C(22) | H(35) | 0.950    | C(22) | H(36) | 0.950    |
| C(23) | H(37) | 0.950    | C(23) | H(38) | 0.950    |
| C(24) | H(39) | 0.950    | C(24) | H(40) | 0.950    |
| C(24) | H(41) | 0.950    | C(25) | H(42) | 0.950    |
| C(25) | H(43) | 0.950    | C(25) | H(44) | 0.950    |

Table 6. Bond angles (°)

| atom  | atom  | atom  | angle      | atom  | atom  | atom  | angle      |
|-------|-------|-------|------------|-------|-------|-------|------------|
| Ir(2) | Ir(1) | P(1)  | 86.75(5)   | Ir(2) | Ir(1) | C(1)  | 132.5(2)   |
| Ir(2) | Ir(1) | C(2)  | 102.6(2)   | Ir(2) | Ir(1) | C(3)  | 98.8(2)    |
| Ir(2) | Ir(1) | C(4)  | 127.1(2)   | Ir(2) | Ir(1) | C(5)  | 160.4(2)   |
| P(1)  | Ir(1) | C(1)  | 106.9(2)   | P(1)  | Ir(1) | C(2)  | 131.6(2)   |
| P(1)  | Ir(1) | C(3)  | 166.8(2)   | P(1)  | Ir(1) | C(4)  | 143.9(2)   |
| P(1)  | Ir(1) | C(5)  | 111.7(2)   | C(1)  | Ir(1) | C(2)  | 35.5(3)    |
| C(1)  | Ir(1) | C(3)  | 60.6(3)    | C(1)  | Ir(1) | C(4)  | 61.6(3)    |
| C(1)  | Ir(1) | C(5)  | 37.8(3)    | C(2)  | Ir(1) | C(3)  | 35.5(3)    |
| C(2)  | Ir(1) | C(4)  | 59.7(3)    | C(2)  | Ir(1) | C(5)  | 60.7(3)    |
| C(3)  | Ir(1) | C(4)  | 36.6(3)    | C(3)  | Ir(1) | C(5)  | 61.8(3)    |
| C(4)  | Ir(1) | C(5)  | 37.3(3)    | Ir(1) | Ir(2) | P(2)  | 84.94(5)   |
| Ir(1) | Ir(2) | C(11) | 129.3(2)   | Ir(1) | Ir(2) | C(12) | 163.5(2)   |
| Ir(1) | Ir(2) | C(13) | 134.3(2)   | Ir(1) | Ir(2) | C(14) | 104.53(19) |
| Ir(1) | Ir(2) | C(15) | 101.65(19) | P(2)  | Ir(2) | C(11) | 143.49(19) |
| P(2)  | Ir(2) | C(12) | 110.6(2)   | P(2)  | Ir(2) | C(13) | 105.5(2)   |
| P(2)  | Ir(2) | C(14) | 129.4(2)   | P(2)  | Ir(2) | C(15) | 166.0(2)   |
| C(11) | Ir(2) | C(12) | 37.7(3)    | C(11) | Ir(2) | C(13) | 62.1(3)    |
| C(11) | Ir(2) | C(14) | 61.3(2)    | C(11) | Ir(2) | C(15) | 36.3(2)    |
| C(12) | Ir(2) | C(13) | 38.0(3)    | C(12) | Ir(2) | C(14) | 61.7(2)    |
| C(12) | Ir(2) | C(15) | 62.0(2)    | C(13) | Ir(2) | C(14) | 35.5(2)    |
| C(13) | Ir(2) | C(15) | 61.1(3)    | C(14) | Ir(2) | C(15) | 37.1(3)    |
| Ir(1) | P(1)  | C(21) | 118.3(3)   | Ir(1) | P(1)  | C(22) | 117.6(4)   |
| Ir(1) | P(1)  | C(23) | 116.4(3)   | C(21) | P(1)  | C(22) | 98.0(5)    |
| C(21) | P(1)  | C(23) | 100.6(5)   | C(22) | P(1)  | C(23) | 102.8(6)   |
| Ir(2) | P(2)  | C(23) | 115.4(3)   | Ir(2) | P(2)  | C(24) | 118.5(3)   |
| Ir(2) | P(2)  | C(25) | 117.6(3)   | C(23) | P(2)  | C(24) | 100.0(5)   |
| C(23) | P(2)  | C(25) | 100.2(6)   | C(24) | P(2)  | C(25) | 102.1(5)   |
| Ir(1) | C(1)  | C(2)  | 73.0(5)    | Ir(1) | C(1)  | C(5)  | 69.3(5)    |
| Ir(1) | C(1)  | C(6)  | 130.1(7)   | C(2)  | C(1)  | C(5)  | 106.5(8)   |
| C(2)  | C(1)  | C(6)  | 128.0(9)   | C(5)  | C(1)  | C(6)  | 124.8(9)   |

|       |       |       |           |       |       |       |           |
|-------|-------|-------|-----------|-------|-------|-------|-----------|
| Ir(1) | C(2)  | C(1)  | 71.5(5)   | Ir(1) | C(2)  | C(3)  | 70.6(5)   |
| Ir(1) | C(2)  | C(7)  | 130.9(6)  | C(1)  | C(2)  | C(3)  | 110.7(7)  |
| C(1)  | C(2)  | C(7)  | 125.4(9)  | C(3)  | C(2)  | C(7)  | 123.4(9)  |
| Ir(1) | C(3)  | C(2)  | 73.9(5)   | Ir(1) | C(3)  | C(4)  | 70.6(5)   |
| Ir(1) | C(3)  | C(8)  | 127.6(6)  | C(2)  | C(3)  | C(4)  | 107.6(8)  |
| C(2)  | C(3)  | C(8)  | 125.3(8)  | C(4)  | C(3)  | C(8)  | 126.5(9)  |
| Ir(1) | C(4)  | C(3)  | 72.8(5)   | Ir(1) | C(4)  | C(5)  | 71.4(5)   |
| Ir(1) | C(4)  | C(9)  | 124.4(7)  | C(3)  | C(4)  | C(5)  | 108.8(8)  |
| C(3)  | C(4)  | C(9)  | 127.8(10) | C(5)  | C(4)  | C(9)  | 123.3(10) |
| Ir(1) | C(5)  | C(1)  | 73.0(5)   | Ir(1) | C(5)  | C(4)  | 71.3(5)   |
| Ir(1) | C(5)  | C(10) | 128.1(8)  | C(1)  | C(5)  | C(4)  | 106.3(8)  |
| C(1)  | C(5)  | C(10) | 124.6(10) | C(4)  | C(5)  | C(10) | 128.4(10) |
| Ir(2) | C(11) | C(12) | 71.0(4)   | Ir(2) | C(11) | C(15) | 72.7(4)   |
| Ir(2) | C(11) | C(16) | 124.7(5)  | C(12) | C(11) | C(15) | 108.8(7)  |
| C(12) | C(11) | C(16) | 126.3(7)  | C(15) | C(11) | C(16) | 124.9(7)  |
| Ir(2) | C(12) | C(11) | 71.2(4)   | Ir(2) | C(12) | C(13) | 72.4(4)   |
| Ir(2) | C(12) | C(17) | 128.3(6)  | C(11) | C(12) | C(13) | 106.0(6)  |
| C(11) | C(12) | C(17) | 126.6(8)  | C(13) | C(12) | C(17) | 126.8(8)  |
| Ir(2) | C(13) | C(12) | 69.6(4)   | Ir(2) | C(13) | C(14) | 73.6(5)   |
| Ir(2) | C(13) | C(18) | 131.0(7)  | C(12) | C(13) | C(14) | 108.9(7)  |
| C(12) | C(13) | C(18) | 123.0(8)  | C(14) | C(13) | C(18) | 127.2(8)  |
| Ir(2) | C(14) | C(13) | 70.9(4)   | Ir(2) | C(14) | C(15) | 69.7(4)   |
| Ir(2) | C(14) | C(19) | 132.1(5)  | C(13) | C(14) | C(15) | 107.8(7)  |
| C(13) | C(14) | C(19) | 126.9(8)  | C(15) | C(14) | C(19) | 124.6(7)  |
| Ir(2) | C(15) | C(11) | 71.0(4)   | Ir(2) | C(15) | C(14) | 73.2(4)   |
| Ir(2) | C(15) | C(20) | 130.2(5)  | C(11) | C(15) | C(14) | 108.5(7)  |
| C(11) | C(15) | C(20) | 129.3(8)  | C(14) | C(15) | C(20) | 121.3(7)  |
| P(1)  | C(23) | P(2)  | 105.3(6)  |       |       |       |           |

Table 7. Bond angles involving hydrogens (°)

| atom  | atom  | atom  | angle | atom  | atom  | atom  | angle |
|-------|-------|-------|-------|-------|-------|-------|-------|
| C(1)  | C(6)  | H(1)  | 110.2 | C(1)  | C(6)  | H(2)  | 109.5 |
| C(1)  | C(6)  | H(3)  | 108.8 | H(1)  | C(6)  | H(2)  | 109.5 |
| H(1)  | C(6)  | H(3)  | 109.5 | H(2)  | C(6)  | H(3)  | 109.5 |
| C(2)  | C(7)  | H(4)  | 110.4 | C(2)  | C(7)  | H(5)  | 108.4 |
| C(2)  | C(7)  | H(6)  | 109.6 | H(4)  | C(7)  | H(5)  | 109.5 |
| H(4)  | C(7)  | H(6)  | 109.5 | H(5)  | C(7)  | H(6)  | 109.5 |
| C(3)  | C(8)  | H(7)  | 109.7 | C(3)  | C(8)  | H(8)  | 109.2 |
| C(3)  | C(8)  | H(9)  | 109.5 | H(7)  | C(8)  | H(8)  | 109.5 |
| H(7)  | C(8)  | H(9)  | 109.5 | H(8)  | C(8)  | H(9)  | 109.5 |
| C(4)  | C(9)  | H(10) | 109.8 | C(4)  | C(9)  | H(11) | 109.4 |
| C(4)  | C(9)  | H(12) | 109.2 | H(10) | C(9)  | H(11) | 109.5 |
| H(10) | C(9)  | H(12) | 109.5 | H(11) | C(9)  | H(12) | 109.5 |
| C(5)  | C(10) | H(13) | 109.8 | C(5)  | C(10) | H(14) | 109.5 |
| C(5)  | C(10) | H(15) | 109.1 | H(13) | C(10) | H(14) | 109.5 |
| H(13) | C(10) | H(15) | 109.5 | H(14) | C(10) | H(15) | 109.5 |
| C(11) | C(16) | H(16) | 109.8 | C(11) | C(16) | H(17) | 109.2 |
| C(11) | C(16) | H(18) | 109.4 | H(16) | C(16) | H(17) | 109.5 |
| H(16) | C(16) | H(18) | 109.5 | H(17) | C(16) | H(18) | 109.5 |
| C(12) | C(17) | H(19) | 110.2 | C(12) | C(17) | H(20) | 109.3 |
| C(12) | C(17) | H(21) | 108.8 | H(19) | C(17) | H(20) | 109.5 |
| H(19) | C(17) | H(21) | 109.5 | H(20) | C(17) | H(21) | 109.5 |
| C(13) | C(18) | H(22) | 108.6 | C(13) | C(18) | H(23) | 109.8 |
| C(13) | C(18) | H(24) | 110.0 | H(22) | C(18) | H(23) | 109.5 |
| H(22) | C(18) | H(24) | 109.5 | H(23) | C(18) | H(24) | 109.5 |
| C(14) | C(19) | H(25) | 109.2 | C(14) | C(19) | H(26) | 109.6 |
| C(14) | C(19) | H(27) | 109.6 | H(25) | C(19) | H(26) | 109.5 |
| H(25) | C(19) | H(27) | 109.5 | H(26) | C(19) | H(27) | 109.5 |
| C(15) | C(20) | H(28) | 109.4 | C(15) | C(20) | H(29) | 109.5 |
| C(15) | C(20) | H(30) | 109.5 | H(28) | C(20) | H(29) | 109.5 |
| H(28) | C(20) | H(30) | 109.5 | H(29) | C(20) | H(30) | 109.5 |

|       |       |       |       |       |       |       |       |
|-------|-------|-------|-------|-------|-------|-------|-------|
| P(1)  | C(21) | H(31) | 110.0 | P(1)  | C(21) | H(32) | 109.1 |
| P(1)  | C(21) | H(33) | 109.3 | H(31) | C(21) | H(32) | 109.5 |
| H(31) | C(21) | H(33) | 109.5 | H(32) | C(21) | H(33) | 109.5 |
| P(1)  | C(22) | H(34) | 109.3 | P(1)  | C(22) | H(35) | 109.5 |
| P(1)  | C(22) | H(36) | 109.6 | H(34) | C(22) | H(35) | 109.5 |
| H(34) | C(22) | H(36) | 109.5 | H(35) | C(22) | H(36) | 109.5 |
| P(1)  | C(23) | H(37) | 109.9 | P(1)  | C(23) | H(38) | 111.3 |
| P(2)  | C(23) | H(37) | 109.8 | P(2)  | C(23) | H(38) | 111.0 |
| H(37) | C(23) | H(38) | 109.5 | P(2)  | C(24) | H(39) | 109.6 |
| P(2)  | C(24) | H(40) | 109.9 | P(2)  | C(24) | H(41) | 108.8 |
| H(39) | C(24) | H(40) | 109.5 | H(39) | C(24) | H(41) | 109.5 |
| H(40) | C(24) | H(41) | 109.5 | P(2)  | C(25) | H(42) | 109.8 |
| P(2)  | C(25) | H(43) | 109.1 | P(2)  | C(25) | H(44) | 109.6 |
| H(42) | C(25) | H(43) | 109.5 | H(42) | C(25) | H(44) | 109.5 |
| H(43) | C(25) | H(44) | 109.5 |       |       |       |       |



**Details of the X-ray crystal structures for complex 8**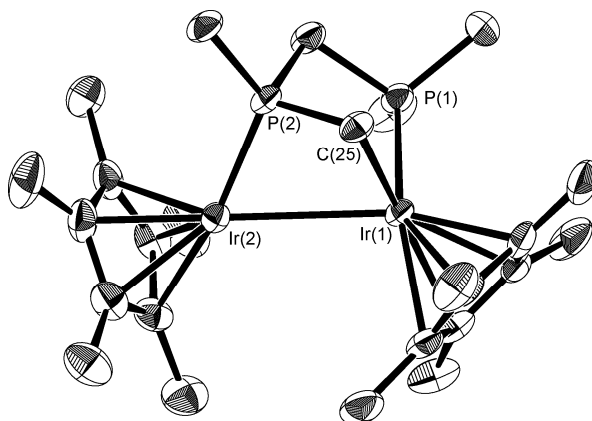

## A. Crystal Data

|                                       |                                |
|---------------------------------------|--------------------------------|
| Empirical Formula                     | $C_{26}H_{45}F_3O_3P_2SIr_2$   |
| Formula Weight                        | 941.08                         |
| Crystal Color, Habit                  | orange, block                  |
| Crystal Dimensions                    | 0.60 X 0.30 X 0.30 mm          |
| Crystal System                        | triclinic                      |
| Lattice Type                          | Primitive                      |
| No. of Reflections Used for Unit      |                                |
| Cell Determination ( $2\theta$ range) | 25 ( 29.4 - 29.9 $^\circ$ )    |
| Omega Scan Peak Width                 |                                |
| at Half-height                        | 0.18 $^\circ$                  |
| Lattice Parameters                    |                                |
|                                       | a = 9.771(3) Å                 |
|                                       | b = 10.880(3) Å                |
|                                       | c = 15.431(3) Å                |
|                                       | $\alpha$ = 80.236(19) $^\circ$ |
|                                       | $\beta$ = 83.09(2) $^\circ$    |
|                                       | $\gamma$ = 86.91(3) $^\circ$   |
|                                       | V = 1604.0(8) Å <sup>3</sup>   |
| Space Group                           | P-1 (#2)                       |

|                   |                         |
|-------------------|-------------------------|
| Z value           | 2                       |
| D <sub>calc</sub> | 1.948 g/cm <sup>3</sup> |
| F <sub>000</sub>  | 904.00                  |
| μ(MoKα)           | 85.182 cm <sup>-1</sup> |

## B. Intensity Measurements

|                              |                                                                       |
|------------------------------|-----------------------------------------------------------------------|
| Diffractometer               | Rigaku AFC5S                                                          |
| Radiation                    | MoKα (λ = 0.71069 Å)<br>graphite monochromated                        |
| Attenuator                   | Zr foil (factors = 1.00, 2.25, 5.26, 11.83)                           |
| Take-off Angle               | 6.0°                                                                  |
| Detector Aperture            | 13.0 mm horizontal<br>9.0 mm vertical                                 |
| Crystal to Detector Distance | 258 mm                                                                |
| Voltage, Current             | 50 kV, 20 mA                                                          |
| Temperature                  | 23.0°C                                                                |
| Scan Type                    | ω-2θ                                                                  |
| Scan Rate                    | 2.0°/min (in ω)                                                       |
| Scan Width                   | (1.31 + 0.30 tan θ)°                                                  |
| 2θ <sub>max</sub>            | 55.0°                                                                 |
| No. of Reflections Measured  | Total: 7637<br>Unique: 7354 (R <sub>int</sub> = 0.020)                |
| Corrections                  | Lorentz-polarization<br>Absorption<br>(trans. factors: 0.063 - 0.078) |

## C. Structure Solution and Refinement

|                          |                                                      |
|--------------------------|------------------------------------------------------|
| Structure Solution       | Patterson Methods (DIRDIF99 PATTY)                   |
| Refinement               | Full-matrix least-squares on F                       |
| Function Minimized       | Σ w ( Fo  -  Fc ) <sup>2</sup>                       |
| Least Squares Weights    | 1/[0.0016Fo <sup>2</sup> +1.0000σ(Fo <sup>2</sup> )] |
| 2θ <sub>max</sub> cutoff | 55.0°                                                |
| Anomalous Dispersion     | All non-hydrogen atoms                               |

|                                          |                                  |
|------------------------------------------|----------------------------------|
| No. Observations ( $I > 3.00\sigma(I)$ ) | 5063                             |
| No. Variables                            | 377                              |
| Reflection/Parameter Ratio               | 13.43                            |
| Residuals: R ( $I > 3.00\sigma(I)$ )     | 0.0375                           |
| Residuals: Rw ( $I > 3.00\sigma(I)$ )    | 0.0497                           |
| Goodness of Fit Indicator                | 1.019                            |
| Max Shift/Error in Final Cycle           | 0.000                            |
| Maximum peak in Final Diff. Map          | $2.36 \text{ e}^-/\text{\AA}^3$  |
| Minimum peak in Final Diff. Map          | $-1.70 \text{ e}^-/\text{\AA}^3$ |

Table 1. Atomic coordinates and  $B_{\text{iso}}/B_{\text{eq}}$ 

| atom  | x          | y           | z           | $B_{\text{eq}}$ |
|-------|------------|-------------|-------------|-----------------|
| Ir(1) | 0.66137(3) | 0.16787(3)  | 0.16242(2)  | 2.976(6)        |
| Ir(2) | 0.58550(3) | 0.23142(3)  | 0.34551(2)  | 3.147(7)        |
| S(1)  | 1.0143(3)  | 0.3123(3)   | 0.7784(2)   | 6.85(8)         |
| P(1)  | 0.8314(2)  | 0.3061(2)   | 0.13932(15) | 3.82(4)         |
| P(2)  | 0.8071(2)  | 0.1731(2)   | 0.31764(14) | 3.35(4)         |
| F(1)  | 0.9396(14) | 0.3708(12)  | 0.6215(7)   | 14.3(4)         |
| F(2)  | 0.9869(14) | 0.1799(11)  | 0.6582(7)   | 15.1(4)         |
| F(3)  | 0.7975(10) | 0.2631(13)  | 0.7123(8)   | 13.4(4)         |
| O(1)  | 0.9374(13) | 0.4179(9)   | 0.8055(9)   | 10.9(3)         |
| O(2)  | 1.1507(11) | 0.3339(15)  | 0.7385(9)   | 14.6(5)         |
| O(3)  | 0.9993(10) | 0.1986(9)   | 0.8414(6)   | 8.9(2)          |
| C(1)  | 0.5778(10) | -0.0034(8)  | 0.1274(6)   | 4.3(2)          |
| C(2)  | 0.4638(9)  | 0.0801(9)   | 0.1453(6)   | 4.4(2)          |
| C(3)  | 0.4844(10) | 0.1934(9)   | 0.0828(6)   | 4.6(2)          |
| C(4)  | 0.6055(9)  | 0.1818(9)   | 0.0262(5)   | 4.4(2)          |
| C(5)  | 0.6705(10) | 0.0573(9)   | 0.0559(5)   | 4.5(2)          |
| C(6)  | 0.5987(15) | -0.1324(9)  | 0.1742(8)   | 6.9(3)          |
| C(7)  | 0.3422(11) | 0.0513(12)  | 0.2154(7)   | 7.2(3)          |
| C(8)  | 0.3814(12) | 0.3010(10)  | 0.0735(9)   | 6.8(3)          |
| C(9)  | 0.6570(14) | 0.2699(12)  | -0.0536(7)  | 7.3(3)          |
| C(10) | 0.7940(12) | -0.0028(11) | 0.0113(7)   | 6.6(3)          |
| C(11) | 0.5919(10) | 0.3870(9)   | 0.4246(6)   | 4.9(2)          |
| C(12) | 0.5328(12) | 0.2716(9)   | 0.4792(6)   | 5.3(2)          |
| C(13) | 0.4099(11) | 0.2503(9)   | 0.4477(7)   | 5.1(2)          |
| C(14) | 0.3880(9)  | 0.3403(9)   | 0.3742(7)   | 4.8(2)          |
| C(15) | 0.5019(11) | 0.4268(7)   | 0.3598(7)   | 4.7(2)          |
| C(16) | 0.7143(12) | 0.4530(11)  | 0.4399(8)   | 7.4(3)          |
| C(17) | 0.5923(17) | 0.2015(14)  | 0.5632(7)   | 8.6(4)          |
| C(18) | 0.3128(12) | 0.1487(11)  | 0.4918(8)   | 7.3(3)          |
| C(19) | 0.2614(11) | 0.3579(11)  | 0.3276(9)   | 6.9(3)          |

|       |            |            |            |          |
|-------|------------|------------|------------|----------|
| C(20) | 0.5117(15) | 0.5439(10) | 0.2930(9)  | 8.0(3)   |
| C(21) | 0.9783(11) | 0.2757(14) | 0.0615(7)  | 7.2(3)   |
| C(22) | 0.7862(13) | 0.4667(9)  | 0.1015(8)  | 7.0(3)   |
| C(23) | 0.9046(9)  | 0.2967(8)  | 0.2449(5)  | 4.3(2)   |
| C(24) | 0.9167(9)  | 0.1210(10) | 0.4056(6)  | 4.7(2)   |
| C(25) | 0.8059(8)  | 0.0654(7)  | 0.2450(5)  | 3.80(18) |
| C(26) | 0.9340(16) | 0.2763(15) | 0.6893(11) | 8.3(4)   |

$$B_{eq} = \frac{8}{3} \pi^2 (U_{11}(aa^*)^2 + U_{22}(bb^*)^2 + U_{33}(cc^*)^2 + 2U_{12}(aa^*bb^*)\cos \gamma + 2U_{13}(aa^*cc^*)\cos \beta + 2U_{23}(bb^*cc^*)\cos \alpha)$$

Table 2. Atomic coordinates and  $B_{\text{iso}}$  involving hydrogens/ $B_{\text{eq}}$ 

| atom  | x      | y       | z       | $B_{\text{eq}}$ |
|-------|--------|---------|---------|-----------------|
| H(1)  | 0.6797 | -0.1685 | 0.1467  | 8.51            |
| H(2)  | 0.5216 | -0.1803 | 0.1709  | 8.51            |
| H(3)  | 0.6091 | -0.1311 | 0.2344  | 8.51            |
| H(4)  | 0.3542 | -0.0306 | 0.2472  | 8.65            |
| H(5)  | 0.2601 | 0.0565  | 0.1875  | 8.65            |
| H(6)  | 0.3357 | 0.1098  | 0.2551  | 8.65            |
| H(7)  | 0.3059 | 0.2864  | 0.1184  | 8.39            |
| H(8)  | 0.3488 | 0.3104  | 0.0171  | 8.40            |
| H(9)  | 0.4251 | 0.3748  | 0.0788  | 8.40            |
| H(10) | 0.5970 | 0.3418  | -0.0584 | 8.70            |
| H(11) | 0.6587 | 0.2324  | -0.1050 | 8.71            |
| H(12) | 0.7474 | 0.2934  | -0.0480 | 8.71            |
| H(13) | 0.8321 | 0.0542  | -0.0383 | 8.40            |
| H(14) | 0.7675 | -0.0755 | -0.0081 | 8.40            |
| H(15) | 0.8610 | -0.0251 | 0.0515  | 8.40            |
| H(16) | 0.7523 | 0.4109  | 0.4912  | 9.50            |
| H(17) | 0.6873 | 0.5360  | 0.4476  | 9.50            |
| H(18) | 0.7815 | 0.4547  | 0.3899  | 9.50            |
| H(19) | 0.5362 | 0.1334  | 0.5896  | 10.45           |
| H(20) | 0.5934 | 0.2579  | 0.6039  | 10.45           |
| H(21) | 0.6836 | 0.1714  | 0.5481  | 10.45           |
| H(22) | 0.2362 | 0.1509  | 0.4590  | 8.42            |
| H(23) | 0.2815 | 0.1629  | 0.5501  | 8.42            |
| H(24) | 0.3590 | 0.0692  | 0.4945  | 8.42            |
| H(25) | 0.2698 | 0.4298  | 0.2831  | 8.37            |
| H(26) | 0.1841 | 0.3691  | 0.3695  | 8.37            |
| H(27) | 0.2491 | 0.2870  | 0.3013  | 8.37            |
| H(28) | 0.5938 | 0.5865  | 0.2937  | 9.11            |
| H(29) | 0.4339 | 0.5970  | 0.3053  | 9.11            |
| H(30) | 0.5100 | 0.5212  | 0.2364  | 9.12            |

|       |        |         |        |      |
|-------|--------|---------|--------|------|
| H(31) | 1.0456 | 0.2252  | 0.0919 | 8.80 |
| H(32) | 1.0171 | 0.3526  | 0.0335 | 8.80 |
| H(33) | 0.9492 | 0.2337  | 0.0181 | 8.79 |
| H(34) | 0.7956 | 0.4826  | 0.0386 | 8.39 |
| H(35) | 0.8456 | 0.5187  | 0.1224 | 8.39 |
| H(36) | 0.6934 | 0.4838  | 0.1236 | 8.39 |
| H(37) | 1.0002 | 0.2744  | 0.2385 | 5.21 |
| H(38) | 0.8914 | 0.3734  | 0.2669 | 5.21 |
| H(39) | 0.9602 | 0.1910  | 0.4181 | 5.73 |
| H(40) | 0.9851 | 0.0626  | 0.3869 | 5.73 |
| H(41) | 0.8623 | 0.0828  | 0.4573 | 5.74 |
| H(42) | 0.7724 | -0.0129 | 0.2743 | 4.64 |
| H(43) | 0.8938 | 0.0534  | 0.2133 | 4.64 |

$$B_{eq} = 8/3 \pi^2 (U_{11}(aa^*)^2 + U_{22}(bb^*)^2 + U_{33}(cc^*)^2 + 2U_{12}(aa^*bb^*)\cos \gamma + 2U_{13}(aa^*cc^*)\cos \beta + 2U_{23}(bb^*cc^*)\cos \alpha)$$

Table 3. Anisotropic displacement parameters

| atom  | U <sub>11</sub> | U <sub>22</sub> | U <sub>33</sub> | U <sub>12</sub> | U <sub>13</sub> | U <sub>23</sub> |
|-------|-----------------|-----------------|-----------------|-----------------|-----------------|-----------------|
| Ir(1) | 0.03934(17)     | 0.03957(18)     | 0.03522(18)     | -0.00645(13)    | -0.01188(13)    | -0.00218(13)    |
| Ir(2) | 0.04570(19)     | 0.03565(17)     | 0.03875(19)     | -0.00601(13)    | -0.00656(14)    | -0.00487(13)    |
| S(1)  | 0.087(2)        | 0.084(2)        | 0.086(2)        | -0.0167(17)     | -0.0237(17)     | 0.0092(17)      |
| P(1)  | 0.0491(12)      | 0.0563(13)      | 0.0395(11)      | -0.0185(10)     | -0.0097(9)      | 0.0014(9)       |
| P(2)  | 0.0458(11)      | 0.0443(11)      | 0.0398(11)      | -0.0055(9)      | -0.0177(9)      | -0.0042(8)      |
| F(1)  | 0.257(14)       | 0.182(10)       | 0.095(7)        | 0.049(10)       | -0.068(8)       | 0.019(7)        |
| F(2)  | 0.274(15)       | 0.176(10)       | 0.148(10)       | 0.117(10)       | -0.079(9)       | -0.091(8)       |
| F(3)  | 0.088(6)        | 0.238(13)       | 0.195(12)       | -0.026(7)       | -0.047(6)       | -0.042(10)      |
| O(1)  | 0.172(11)       | 0.074(6)        | 0.191(12)       | 0.009(6)        | -0.085(9)       | -0.040(7)       |
| O(2)  | 0.082(7)        | 0.241(15)       | 0.212(15)       | -0.072(8)       | -0.017(8)       | 0.043(11)       |
| O(3)  | 0.127(8)        | 0.105(7)        | 0.084(6)        | 0.022(6)        | -0.003(5)       | 0.030(5)        |
| C(1)  | 0.072(6)        | 0.043(4)        | 0.053(5)        | -0.014(4)       | -0.030(4)       | -0.006(4)       |
| C(2)  | 0.056(5)        | 0.059(5)        | 0.057(5)        | -0.022(4)       | -0.023(4)       | -0.005(4)       |
| C(3)  | 0.061(5)        | 0.060(5)        | 0.062(6)        | -0.002(4)       | -0.037(4)       | -0.011(4)       |
| C(4)  | 0.055(5)        | 0.077(6)        | 0.039(4)        | -0.017(4)       | -0.015(3)       | -0.011(4)       |
| C(5)  | 0.072(6)        | 0.065(5)        | 0.039(4)        | -0.010(4)       | -0.019(4)       | -0.015(4)       |
| C(6)  | 0.132(11)       | 0.048(5)        | 0.090(8)        | -0.017(6)       | -0.041(8)       | -0.008(5)       |
| C(7)  | 0.076(7)        | 0.126(11)       | 0.071(7)        | -0.061(7)       | -0.015(6)       | 0.001(7)        |
| C(8)  | 0.073(7)        | 0.074(7)        | 0.119(11)       | -0.006(6)       | -0.048(7)       | -0.006(7)       |
| C(9)  | 0.113(9)        | 0.112(10)       | 0.051(6)        | -0.047(8)       | -0.042(6)       | 0.024(6)        |
| C(10) | 0.097(8)        | 0.101(9)        | 0.067(7)        | 0.002(7)        | -0.020(6)       | -0.049(7)       |
| C(11) | 0.073(6)        | 0.056(5)        | 0.059(6)        | -0.014(4)       | 0.014(5)        | -0.028(4)       |
| C(12) | 0.093(7)        | 0.062(6)        | 0.051(5)        | -0.018(5)       | 0.005(5)        | -0.025(4)       |
| C(13) | 0.069(6)        | 0.047(5)        | 0.074(7)        | -0.012(4)       | 0.010(5)        | -0.013(4)       |
| C(14) | 0.049(5)        | 0.052(5)        | 0.080(7)        | 0.006(4)        | -0.003(4)       | -0.016(5)       |
| C(15) | 0.079(6)        | 0.029(4)        | 0.066(6)        | 0.004(4)        | 0.007(5)        | -0.005(4)       |
| C(16) | 0.090(8)        | 0.100(9)        | 0.111(10)       | -0.025(7)       | -0.006(7)       | -0.073(8)       |
| C(17) | 0.162(14)       | 0.124(12)       | 0.044(6)        | -0.020(10)      | -0.026(7)       | -0.005(7)       |
| C(18) | 0.083(8)        | 0.079(8)        | 0.104(10)       | -0.022(6)       | 0.018(7)        | 0.003(7)        |
| C(19) | 0.068(7)        | 0.080(8)        | 0.117(11)       | 0.022(6)        | -0.020(7)       | -0.029(7)       |



This journal is © The Royal Society of Chemistry 2008

|       |           |           |           |           |           |           |
|-------|-----------|-----------|-----------|-----------|-----------|-----------|
| C(20) | 0.133(12) | 0.045(6)  | 0.111(10) | 0.011(6)  | 0.024(9)  | -0.000(6) |
| C(21) | 0.060(6)  | 0.158(13) | 0.060(7)  | -0.038(7) | 0.015(5)  | -0.033(7) |
| C(22) | 0.112(10) | 0.064(6)  | 0.090(8)  | -0.037(6) | -0.046(7) | 0.020(6)  |
| C(23) | 0.058(5)  | 0.056(5)  | 0.051(5)  | -0.020(4) | -0.016(4) | -0.005(4) |
| C(24) | 0.056(5)  | 0.079(6)  | 0.047(5)  | -0.008(4) | -0.026(4) | 0.001(4)  |
| C(25) | 0.048(4)  | 0.046(4)  | 0.053(5)  | 0.006(3)  | -0.021(3) | -0.006(3) |
| C(26) | 0.094(10) | 0.094(10) | 0.123(13) | 0.021(8)  | -0.024(9) | -0.001(9) |

The general temperature factor expression:  $\exp(-2\pi^2(a^2U_{11}h^2 + b^2U_{22}k^2 + c^2U_{33}l^2 + 2a*b*U_{12}hk + 2a*c*U_{13}hl + 2b*c*U_{23}kl))$

Table 4. Bond lengths (Å)

| atom  | atom  | distance  | atom  | atom  | distance  |
|-------|-------|-----------|-------|-------|-----------|
| Ir(1) | Ir(2) | 3.0188(4) | Ir(1) | P(1)  | 2.257(2)  |
| Ir(1) | C(1)  | 2.245(9)  | Ir(1) | C(2)  | 2.261(10) |
| Ir(1) | C(3)  | 2.218(10) | Ir(1) | C(4)  | 2.213(9)  |
| Ir(1) | C(5)  | 2.186(10) | Ir(1) | C(25) | 2.155(8)  |
| Ir(2) | P(2)  | 2.235(2)  | Ir(2) | C(11) | 2.256(11) |
| Ir(2) | C(12) | 2.177(10) | Ir(2) | C(13) | 2.212(10) |
| Ir(2) | C(14) | 2.247(9)  | Ir(2) | C(15) | 2.272(8)  |
| S(1)  | O(1)  | 1.433(12) | S(1)  | O(2)  | 1.414(11) |
| S(1)  | O(3)  | 1.440(9)  | S(1)  | C(26) | 1.770(19) |
| P(1)  | C(21) | 1.812(11) | P(1)  | C(22) | 1.795(10) |
| P(1)  | C(23) | 1.842(9)  | P(2)  | C(23) | 1.829(8)  |
| P(2)  | C(24) | 1.826(10) | P(2)  | C(25) | 1.755(9)  |
| F(1)  | C(26) | 1.334(19) | F(2)  | C(26) | 1.28(2)   |
| F(3)  | C(26) | 1.347(18) | C(1)  | C(2)  | 1.430(13) |
| C(1)  | C(5)  | 1.431(12) | C(1)  | C(6)  | 1.481(13) |
| C(2)  | C(3)  | 1.438(12) | C(2)  | C(7)  | 1.515(13) |
| C(3)  | C(4)  | 1.397(12) | C(3)  | C(8)  | 1.501(14) |
| C(4)  | C(5)  | 1.488(13) | C(4)  | C(9)  | 1.480(14) |
| C(5)  | C(10) | 1.492(15) | C(11) | C(12) | 1.491(13) |
| C(11) | C(15) | 1.410(15) | C(11) | C(16) | 1.490(17) |
| C(12) | C(13) | 1.393(16) | C(12) | C(17) | 1.548(17) |
| C(13) | C(14) | 1.396(14) | C(13) | C(18) | 1.513(15) |
| C(14) | C(15) | 1.468(14) | C(14) | C(19) | 1.492(16) |
| C(15) | C(20) | 1.496(14) |       |       |           |

Table 5. Bond lengths involving hydrogens (Å)

| atom  | atom  | distance | atom  | atom  | distance |
|-------|-------|----------|-------|-------|----------|
| C(6)  | H(1)  | 0.950    | C(6)  | H(2)  | 0.950    |
| C(6)  | H(3)  | 0.950    | C(7)  | H(4)  | 0.950    |
| C(7)  | H(5)  | 0.950    | C(7)  | H(6)  | 0.950    |
| C(8)  | H(7)  | 0.950    | C(8)  | H(8)  | 0.950    |
| C(8)  | H(9)  | 0.950    | C(9)  | H(10) | 0.950    |
| C(9)  | H(11) | 0.950    | C(9)  | H(12) | 0.950    |
| C(10) | H(13) | 0.950    | C(10) | H(14) | 0.950    |
| C(10) | H(15) | 0.950    | C(16) | H(16) | 0.950    |
| C(16) | H(17) | 0.950    | C(16) | H(18) | 0.950    |
| C(17) | H(19) | 0.950    | C(17) | H(20) | 0.950    |
| C(17) | H(21) | 0.950    | C(18) | H(22) | 0.950    |
| C(18) | H(23) | 0.950    | C(18) | H(24) | 0.950    |
| C(19) | H(25) | 0.950    | C(19) | H(26) | 0.950    |
| C(19) | H(27) | 0.950    | C(20) | H(28) | 0.950    |
| C(20) | H(29) | 0.950    | C(20) | H(30) | 0.950    |
| C(21) | H(31) | 0.950    | C(21) | H(32) | 0.950    |
| C(21) | H(33) | 0.950    | C(22) | H(34) | 0.950    |
| C(22) | H(35) | 0.950    | C(22) | H(36) | 0.950    |
| C(23) | H(37) | 0.950    | C(23) | H(38) | 0.950    |
| C(24) | H(39) | 0.950    | C(24) | H(40) | 0.950    |
| C(24) | H(41) | 0.950    | C(25) | H(42) | 0.950    |
| C(25) | H(43) | 0.950    |       |       |          |

Table 6. Bond angles (°)

| atom  | atom  | atom  | angle    | atom  | atom  | atom  | angle    |
|-------|-------|-------|----------|-------|-------|-------|----------|
| Ir(2) | Ir(1) | P(1)  | 89.34(6) | Ir(2) | Ir(1) | C(1)  | 119.6(2) |
| Ir(2) | Ir(1) | C(2)  | 99.5(2)  | Ir(2) | Ir(1) | C(3)  | 112.5(2) |
| Ir(2) | Ir(1) | C(4)  | 147.4(2) | Ir(2) | Ir(1) | C(5)  | 157.2(2) |
| Ir(2) | Ir(1) | C(25) | 73.4(2)  | P(1)  | Ir(1) | C(1)  | 148.0(2) |
| P(1)  | Ir(1) | C(2)  | 159.2(2) | P(1)  | Ir(1) | C(3)  | 121.7(2) |
| P(1)  | Ir(1) | C(4)  | 100.4(2) | P(1)  | Ir(1) | C(5)  | 112.1(2) |
| P(1)  | Ir(1) | C(25) | 80.3(2)  | C(1)  | Ir(1) | C(2)  | 37.0(3)  |
| C(1)  | Ir(1) | C(3)  | 62.3(3)  | C(1)  | Ir(1) | C(4)  | 63.2(3)  |
| C(1)  | Ir(1) | C(5)  | 37.7(3)  | C(1)  | Ir(1) | C(25) | 94.5(3)  |
| C(2)  | Ir(1) | C(3)  | 37.4(3)  | C(2)  | Ir(1) | C(4)  | 62.5(3)  |
| C(2)  | Ir(1) | C(5)  | 63.2(3)  | C(2)  | Ir(1) | C(25) | 120.2(3) |
| C(3)  | Ir(1) | C(4)  | 36.8(3)  | C(3)  | Ir(1) | C(5)  | 63.7(3)  |
| C(3)  | Ir(1) | C(25) | 156.2(3) | C(4)  | Ir(1) | C(5)  | 39.5(3)  |
| C(4)  | Ir(1) | C(25) | 138.7(3) | C(5)  | Ir(1) | C(25) | 101.5(3) |
| Ir(1) | Ir(2) | P(2)  | 66.11(5) | Ir(1) | Ir(2) | C(11) | 142.1(2) |
| Ir(1) | Ir(2) | C(12) | 178.3(2) | Ir(1) | Ir(2) | C(13) | 143.3(3) |
| Ir(1) | Ir(2) | C(14) | 119.2(3) | Ir(1) | Ir(2) | C(15) | 119.0(2) |
| P(2)  | Ir(2) | C(11) | 103.8(2) | P(2)  | Ir(2) | C(12) | 113.0(3) |
| P(2)  | Ir(2) | C(13) | 146.6(2) | P(2)  | Ir(2) | C(14) | 164.3(2) |
| P(2)  | Ir(2) | C(15) | 126.4(2) | C(11) | Ir(2) | C(12) | 39.3(3)  |
| C(11) | Ir(2) | C(13) | 63.0(3)  | C(11) | Ir(2) | C(14) | 62.5(3)  |
| C(11) | Ir(2) | C(15) | 36.3(3)  | C(12) | Ir(2) | C(13) | 37.0(4)  |
| C(12) | Ir(2) | C(14) | 62.1(4)  | C(12) | Ir(2) | C(15) | 62.7(3)  |
| C(13) | Ir(2) | C(14) | 36.5(3)  | C(13) | Ir(2) | C(15) | 62.1(3)  |
| C(14) | Ir(2) | C(15) | 37.9(3)  | O(1)  | S(1)  | O(2)  | 116.2(8) |
| O(1)  | S(1)  | O(3)  | 114.6(6) | O(1)  | S(1)  | C(26) | 105.5(8) |
| O(2)  | S(1)  | O(3)  | 114.4(7) | O(2)  | S(1)  | C(26) | 101.6(8) |
| O(3)  | S(1)  | C(26) | 101.9(7) | Ir(1) | P(1)  | C(21) | 116.3(5) |
| Ir(1) | P(1)  | C(22) | 117.5(4) | Ir(1) | P(1)  | C(23) | 107.1(2) |
| C(21) | P(1)  | C(22) | 102.9(6) | C(21) | P(1)  | C(23) | 104.0(4) |

|       |       |       |           |       |       |       |           |
|-------|-------|-------|-----------|-------|-------|-------|-----------|
| C(22) | P(1)  | C(23) | 108.0(5)  | Ir(2) | P(2)  | C(23) | 111.5(2)  |
| Ir(2) | P(2)  | C(24) | 122.4(3)  | Ir(2) | P(2)  | C(25) | 104.5(3)  |
| C(23) | P(2)  | C(24) | 103.6(4)  | C(23) | P(2)  | C(25) | 99.8(4)   |
| C(24) | P(2)  | C(25) | 112.8(4)  | Ir(1) | C(1)  | C(2)  | 72.1(5)   |
| Ir(1) | C(1)  | C(5)  | 68.9(5)   | Ir(1) | C(1)  | C(6)  | 125.2(8)  |
| C(2)  | C(1)  | C(5)  | 109.1(7)  | C(2)  | C(1)  | C(6)  | 126.2(8)  |
| C(5)  | C(1)  | C(6)  | 124.6(9)  | Ir(1) | C(2)  | C(1)  | 70.9(5)   |
| Ir(1) | C(2)  | C(3)  | 69.7(5)   | Ir(1) | C(2)  | C(7)  | 126.3(7)  |
| C(1)  | C(2)  | C(3)  | 107.3(7)  | C(1)  | C(2)  | C(7)  | 125.8(8)  |
| C(3)  | C(2)  | C(7)  | 126.9(9)  | Ir(1) | C(3)  | C(2)  | 72.9(5)   |
| Ir(1) | C(3)  | C(4)  | 71.4(5)   | Ir(1) | C(3)  | C(8)  | 127.9(8)  |
| C(2)  | C(3)  | C(4)  | 109.8(8)  | C(2)  | C(3)  | C(8)  | 124.3(8)  |
| C(4)  | C(3)  | C(8)  | 125.5(8)  | Ir(1) | C(4)  | C(3)  | 71.8(5)   |
| Ir(1) | C(4)  | C(5)  | 69.3(5)   | Ir(1) | C(4)  | C(9)  | 128.0(8)  |
| C(3)  | C(4)  | C(5)  | 107.4(7)  | C(3)  | C(4)  | C(9)  | 127.6(9)  |
| C(5)  | C(4)  | C(9)  | 124.8(8)  | Ir(1) | C(5)  | C(1)  | 73.4(5)   |
| Ir(1) | C(5)  | C(4)  | 71.2(5)   | Ir(1) | C(5)  | C(10) | 128.3(8)  |
| C(1)  | C(5)  | C(4)  | 106.3(7)  | C(1)  | C(5)  | C(10) | 125.6(8)  |
| C(4)  | C(5)  | C(10) | 127.3(8)  | Ir(2) | C(11) | C(12) | 67.5(5)   |
| Ir(2) | C(11) | C(15) | 72.5(6)   | Ir(2) | C(11) | C(16) | 128.3(7)  |
| C(12) | C(11) | C(15) | 105.9(9)  | C(12) | C(11) | C(16) | 127.1(9)  |
| C(15) | C(11) | C(16) | 126.8(9)  | Ir(2) | C(12) | C(11) | 73.2(5)   |
| Ir(2) | C(12) | C(13) | 72.9(6)   | Ir(2) | C(12) | C(17) | 125.8(8)  |
| C(11) | C(12) | C(13) | 108.1(8)  | C(11) | C(12) | C(17) | 123.7(11) |
| C(13) | C(12) | C(17) | 127.7(10) | Ir(2) | C(13) | C(12) | 70.1(6)   |
| Ir(2) | C(13) | C(14) | 73.1(5)   | Ir(2) | C(13) | C(18) | 126.1(7)  |
| C(12) | C(13) | C(14) | 109.9(8)  | C(12) | C(13) | C(18) | 123.7(9)  |
| C(14) | C(13) | C(18) | 126.3(10) | Ir(2) | C(14) | C(13) | 70.4(5)   |
| Ir(2) | C(14) | C(15) | 71.9(5)   | Ir(2) | C(14) | C(19) | 130.3(8)  |
| C(13) | C(14) | C(15) | 107.6(9)  | C(13) | C(14) | C(19) | 126.3(9)  |
| C(15) | C(14) | C(19) | 125.5(8)  | Ir(2) | C(15) | C(11) | 71.2(5)   |
| Ir(2) | C(15) | C(14) | 70.1(5)   | Ir(2) | C(15) | C(20) | 129.0(7)  |
| C(11) | C(15) | C(14) | 108.4(8)  | C(11) | C(15) | C(20) | 126.2(10) |

|       |       |       |           |      |       |      |           |
|-------|-------|-------|-----------|------|-------|------|-----------|
| C(14) | C(15) | C(20) | 125.1(10) | P(1) | C(23) | P(2) | 103.0(4)  |
| Ir(1) | C(25) | P(2)  | 97.0(3)   | S(1) | C(26) | F(1) | 111.5(12) |
| S(1)  | C(26) | F(2)  | 114.2(12) | S(1) | C(26) | F(3) | 110.8(12) |
| F(1)  | C(26) | F(2)  | 106.6(14) | F(1) | C(26) | F(3) | 103.2(13) |
| F(2)  | C(26) | F(3)  | 109.9(15) |      |       |      |           |

Table 7. Bond angles involving hydrogens ( $^{\circ}$ )

| atom  | atom  | atom  | angle | atom  | atom  | atom  | angle |
|-------|-------|-------|-------|-------|-------|-------|-------|
| C(1)  | C(6)  | H(1)  | 108.8 | C(1)  | C(6)  | H(2)  | 109.7 |
| C(1)  | C(6)  | H(3)  | 109.9 | H(1)  | C(6)  | H(2)  | 109.5 |
| H(1)  | C(6)  | H(3)  | 109.5 | H(2)  | C(6)  | H(3)  | 109.5 |
| C(2)  | C(7)  | H(4)  | 109.5 | C(2)  | C(7)  | H(5)  | 109.1 |
| C(2)  | C(7)  | H(6)  | 109.8 | H(4)  | C(7)  | H(5)  | 109.5 |
| H(4)  | C(7)  | H(6)  | 109.5 | H(5)  | C(7)  | H(6)  | 109.5 |
| C(3)  | C(8)  | H(7)  | 110.1 | C(3)  | C(8)  | H(8)  | 109.5 |
| C(3)  | C(8)  | H(9)  | 108.9 | H(7)  | C(8)  | H(8)  | 109.5 |
| H(7)  | C(8)  | H(9)  | 109.5 | H(8)  | C(8)  | H(9)  | 109.5 |
| C(4)  | C(9)  | H(10) | 108.4 | C(4)  | C(9)  | H(11) | 110.4 |
| C(4)  | C(9)  | H(12) | 109.6 | H(10) | C(9)  | H(11) | 109.5 |
| H(10) | C(9)  | H(12) | 109.5 | H(11) | C(9)  | H(12) | 109.5 |
| C(5)  | C(10) | H(13) | 109.3 | C(5)  | C(10) | H(14) | 109.4 |
| C(5)  | C(10) | H(15) | 109.7 | H(13) | C(10) | H(14) | 109.5 |
| H(13) | C(10) | H(15) | 109.5 | H(14) | C(10) | H(15) | 109.5 |
| C(11) | C(16) | H(16) | 110.2 | C(11) | C(16) | H(17) | 109.4 |
| C(11) | C(16) | H(18) | 108.8 | H(16) | C(16) | H(17) | 109.5 |
| H(16) | C(16) | H(18) | 109.5 | H(17) | C(16) | H(18) | 109.5 |
| C(12) | C(17) | H(19) | 109.9 | C(12) | C(17) | H(20) | 108.6 |
| C(12) | C(17) | H(21) | 109.9 | H(19) | C(17) | H(20) | 109.5 |
| H(19) | C(17) | H(21) | 109.5 | H(20) | C(17) | H(21) | 109.5 |
| C(13) | C(18) | H(22) | 109.4 | C(13) | C(18) | H(23) | 108.8 |
| C(13) | C(18) | H(24) | 110.3 | H(22) | C(18) | H(23) | 109.5 |
| H(22) | C(18) | H(24) | 109.5 | H(23) | C(18) | H(24) | 109.5 |
| C(14) | C(19) | H(25) | 109.3 | C(14) | C(19) | H(26) | 108.6 |
| C(14) | C(19) | H(27) | 110.4 | H(25) | C(19) | H(26) | 109.5 |
| H(25) | C(19) | H(27) | 109.5 | H(26) | C(19) | H(27) | 109.5 |
| C(15) | C(20) | H(28) | 112.2 | C(15) | C(20) | H(29) | 108.7 |
| C(15) | C(20) | H(30) | 107.5 | H(28) | C(20) | H(29) | 109.5 |
| H(28) | C(20) | H(30) | 109.5 | H(29) | C(20) | H(30) | 109.5 |

|       |       |       |       |       |       |       |       |
|-------|-------|-------|-------|-------|-------|-------|-------|
| P(1)  | C(21) | H(31) | 109.7 | P(1)  | C(21) | H(32) | 109.3 |
| P(1)  | C(21) | H(33) | 109.5 | H(31) | C(21) | H(32) | 109.5 |
| H(31) | C(21) | H(33) | 109.5 | H(32) | C(21) | H(33) | 109.5 |
| P(1)  | C(22) | H(34) | 109.7 | P(1)  | C(22) | H(35) | 109.4 |
| P(1)  | C(22) | H(36) | 109.3 | H(34) | C(22) | H(35) | 109.5 |
| H(34) | C(22) | H(36) | 109.5 | H(35) | C(22) | H(36) | 109.5 |
| P(1)  | C(23) | H(37) | 111.0 | P(1)  | C(23) | H(38) | 111.4 |
| P(2)  | C(23) | H(37) | 110.8 | P(2)  | C(23) | H(38) | 111.1 |
| H(37) | C(23) | H(38) | 109.5 | P(2)  | C(24) | H(39) | 109.1 |
| P(2)  | C(24) | H(40) | 109.6 | P(2)  | C(24) | H(41) | 109.7 |
| H(39) | C(24) | H(40) | 109.5 | H(39) | C(24) | H(41) | 109.5 |
| H(40) | C(24) | H(41) | 109.5 | Ir(1) | C(25) | H(42) | 112.3 |
| Ir(1) | C(25) | H(43) | 112.6 | P(2)  | C(25) | H(42) | 112.3 |
| P(2)  | C(25) | H(43) | 112.8 | H(42) | C(25) | H(43) | 109.5 |



**Details of the X-ray crystal structures for complex 12**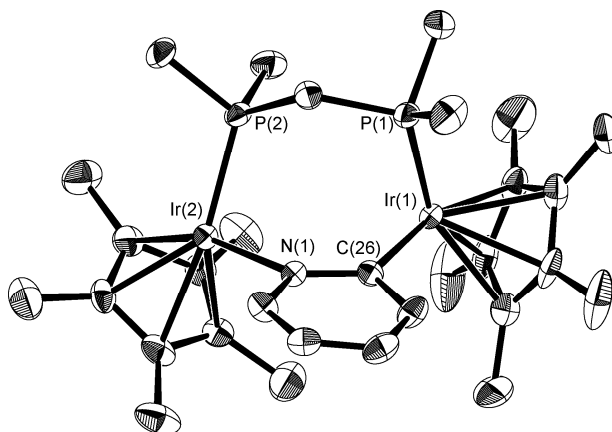**A. Crystal Data**

|                                       |                                                                                                                    |
|---------------------------------------|--------------------------------------------------------------------------------------------------------------------|
| Empirical Formula                     | $C_{31}H_{50}NP_2Ir_2SO_3F_3$                                                                                      |
| Formula Weight                        | 1020.18                                                                                                            |
| Crystal Color, Habit                  | orange, block                                                                                                      |
| Crystal Dimensions                    | 0.40 X 0.35 X 0.35 mm                                                                                              |
| Crystal System                        | monoclinic                                                                                                         |
| Lattice Type                          | Primitive                                                                                                          |
| No. of Reflections Used for Unit      |                                                                                                                    |
| Cell Determination ( $2\theta$ range) | 24 ( 28.7 - 29.9 $^\circ$ )                                                                                        |
| Omega Scan Peak Width                 |                                                                                                                    |
| at Half-height                        | 0.14 $^\circ$                                                                                                      |
| Lattice Parameters                    | a = 17.7878(14) Å<br>b = 12.3618(17) Å<br>c = 18.402(2) Å<br>$\beta$ = 117.595(7) $^\circ$<br>V = 3586.1(7) Å $^3$ |
| Space Group                           | P2 $_1$ /a (#14)                                                                                                   |
| Z value                               | 4                                                                                                                  |
| D <sub>calc</sub>                     | 1.889 g/cm $^3$                                                                                                    |

|                                      |                                                                              |
|--------------------------------------|------------------------------------------------------------------------------|
| F <sub>000</sub>                     | 1976.00                                                                      |
| μ(MoKα)                              | 76.290 cm <sup>-1</sup>                                                      |
| B. Intensity Measurements            |                                                                              |
| Diffractometer                       | Rigaku AFC5S                                                                 |
| Radiation                            | MoKα (λ = 0.71069 Å)<br>graphite monochromated                               |
| Attenuator                           | Zr foil (factors = 1.00, 2.25, 5.26, 11.83)                                  |
| Take-off Angle                       | 6.0°                                                                         |
| Detector Aperture                    | 13.0 mm horizontal<br>9.0 mm vertical                                        |
| Crystal to Detector Distance         | 258 mm                                                                       |
| Voltage, Current                     | 50 kV, 20 mA                                                                 |
| Temperature                          | 20.0°C                                                                       |
| Scan Type                            | ω-2θ                                                                         |
| Scan Rate                            | 2.0°/min (in ω)                                                              |
| Scan Width                           | (1.15 + 0.30 tan θ)°                                                         |
| 2θ <sub>max</sub>                    | 55.0°                                                                        |
| No. of Reflections Measured          | Total: 8475<br>Unique: 8206 (R <sub>int</sub> = 0.023)                       |
| Corrections                          | Lorentz-polarization<br>Absorption<br>(trans. factors: 0.042 - 0.069)        |
| C. Structure Solution and Refinement |                                                                              |
| Structure Solution                   | Patterson Methods (DIRDIF99 PATTY)                                           |
| Refinement                           | Full-matrix least-squares on F                                               |
| Function Minimized                   | Σ w ( F <sub>o</sub>   -  F <sub>c</sub>  ) <sup>2</sup>                     |
| Least Squares Weights                | 1/[0.0025F <sub>o</sub> <sup>2</sup> +1.0000σ(F <sub>o</sub> <sup>2</sup> )] |
| 2θ <sub>max</sub> cutoff             | 55.0°                                                                        |
| Anomalous Dispersion                 | All non-hydrogen atoms                                                       |
| No. Observations (I>3.00σ(I))        | 5785                                                                         |
| No. Variables                        | 436                                                                          |

|                                       |                                  |
|---------------------------------------|----------------------------------|
| Reflection/Parameter Ratio            | 13.27                            |
| Residuals: R ( $I > 3.00\sigma(I)$ )  | 0.0426                           |
| Residuals: Rw ( $I > 3.00\sigma(I)$ ) | 0.0598                           |
| Goodness of Fit Indicator             | 1.007                            |
| Max Shift/Error in Final Cycle        | 0.000                            |
| Maximum peak in Final Diff. Map       | $5.55 \text{ e}^-/\text{\AA}^3$  |
| Minimum peak in Final Diff. Map       | $-2.43 \text{ e}^-/\text{\AA}^3$ |

Table 1. Atomic coordinates and  $B_{\text{iso}}/B_{\text{eq}}$ 

| atom  | x           | y           | z           | $B_{\text{eq}}$ |
|-------|-------------|-------------|-------------|-----------------|
| Ir(1) | 0.67122(2)  | 0.24886(3)  | 0.32230(2)  | 2.573(7)        |
| Ir(2) | 0.56875(2)  | 0.29872(3)  | 0.07868(2)  | 2.572(7)        |
| S(1)  | 0.3331(2)   | 0.7506(3)   | 0.2553(2)   | 5.82(8)         |
| P(1)  | 0.73176(16) | 0.4081(2)   | 0.32338(15) | 3.32(5)         |
| P(2)  | 0.69718(15) | 0.3771(2)   | 0.14211(15) | 2.99(5)         |
| F(1)  | 0.4925(6)   | 0.7147(10)  | 0.2998(7)   | 10.3(3)         |
| F(2)  | 0.4468(6)   | 0.6426(9)   | 0.3769(5)   | 10.4(3)         |
| F(3)  | 0.4695(6)   | 0.8114(8)   | 0.3847(6)   | 9.3(3)          |
| O(1)  | 0.3445(10)  | 0.8483(11)  | 0.2156(7)   | 12.2(5)         |
| O(2)  | 0.3153(6)   | 0.6582(10)  | 0.2080(6)   | 9.4(3)          |
| O(3)  | 0.2894(7)   | 0.7720(9)   | 0.3027(7)   | 7.8(3)          |
| N(1)  | 0.5301(4)   | 0.3540(5)   | 0.1676(4)   | 2.51(14)        |
| C(1)  | 0.6968(8)   | 0.0746(9)   | 0.3651(6)   | 4.8(2)          |
| C(2)  | 0.7695(7)   | 0.1361(10)  | 0.4136(6)   | 4.5(2)          |
| C(3)  | 0.7475(7)   | 0.2084(10)  | 0.4588(6)   | 4.4(2)          |
| C(4)  | 0.6601(8)   | 0.1954(11)  | 0.4361(6)   | 5.1(3)          |
| C(5)  | 0.6269(7)   | 0.1109(11)  | 0.3766(6)   | 4.9(2)          |
| C(6)  | 0.6986(14)  | -0.0272(12) | 0.3173(8)   | 11.0(6)         |
| C(7)  | 0.8576(8)   | 0.1116(16)  | 0.4263(10)  | 9.6(5)          |
| C(8)  | 0.8065(9)   | 0.2822(13)  | 0.5281(6)   | 7.3(4)          |
| C(9)  | 0.6175(12)  | 0.2479(15)  | 0.4832(8)   | 8.8(5)          |
| C(10) | 0.5421(9)   | 0.0628(15)  | 0.3451(9)   | 9.7(5)          |
| C(11) | 0.4545(6)   | 0.1980(9)   | 0.0008(6)   | 4.3(2)          |
| C(12) | 0.4926(7)   | 0.2326(8)   | -0.0454(5)  | 3.9(2)          |
| C(13) | 0.5802(7)   | 0.1890(9)   | -0.0085(6)  | 4.4(2)          |
| C(14) | 0.5895(6)   | 0.1191(7)   | 0.0600(5)   | 3.4(2)          |
| C(15) | 0.5152(6)   | 0.1295(7)   | 0.0659(6)   | 3.6(2)          |
| C(16) | 0.3662(7)   | 0.2178(12)  | -0.0133(8)  | 6.3(3)          |
| C(17) | 0.4484(9)   | 0.2917(11)  | -0.1268(7)  | 6.8(3)          |
| C(18) | 0.6402(9)   | 0.1975(12)  | -0.0446(8)  | 6.6(4)          |

|       |           |            |            |          |
|-------|-----------|------------|------------|----------|
| C(19) | 0.6648(8) | 0.0542(10) | 0.1086(7)  | 6.3(3)   |
| C(20) | 0.4955(9) | 0.0717(11) | 0.1277(7)  | 6.6(3)   |
| C(21) | 0.7053(8) | 0.5196(10) | 0.3721(7)  | 6.4(3)   |
| C(22) | 0.8468(7) | 0.4129(12) | 0.3773(6)  | 6.1(3)   |
| C(23) | 0.7079(6) | 0.4693(7)  | 0.2246(5)  | 3.5(2)   |
| C(24) | 0.7922(6) | 0.2969(10) | 0.1822(7)  | 4.7(2)   |
| C(25) | 0.7189(7) | 0.4678(10) | 0.0760(6)  | 5.3(3)   |
| C(26) | 0.5603(5) | 0.3281(7)  | 0.2484(5)  | 2.81(17) |
| C(27) | 0.5122(6) | 0.3649(9)  | 0.2867(6)  | 4.0(2)   |
| C(28) | 0.4395(6) | 0.4263(9)  | 0.2473(7)  | 4.5(2)   |
| C(29) | 0.4162(5) | 0.4567(8)  | 0.1680(6)  | 3.6(2)   |
| C(30) | 0.4592(5) | 0.4197(8)  | 0.1299(5)  | 3.5(2)   |
| C(31) | 0.4403(9) | 0.7297(13) | 0.3305(10) | 6.3(3)   |

$$B_{\text{eq}} = 8/3 \pi^2 (U_{11}(\text{aa}^*)^2 + U_{22}(\text{bb}^*)^2 + U_{33}(\text{cc}^*)^2 + 2U_{12}(\text{aa}^*\text{bb}^*)\cos \gamma + 2U_{13}(\text{aa}^*\text{cc}^*)\cos \beta + 2U_{23}(\text{bb}^*\text{cc}^*)\cos \alpha)$$

Table 2. Atomic coordinates and  $B_{\text{iso}}$  involving hydrogens/ $B_{\text{eq}}$ 

| atom  | x      | y       | z       | $B_{\text{eq}}$ |
|-------|--------|---------|---------|-----------------|
| H(1)  | 0.7541 | -0.0383 | 0.3235  | 13.33           |
| H(2)  | 0.6818 | -0.0885 | 0.3373  | 13.33           |
| H(3)  | 0.6601 | -0.0169 | 0.2610  | 13.33           |
| H(4)  | 0.8955 | 0.1609  | 0.4659  | 12.10           |
| H(5)  | 0.8731 | 0.0396  | 0.4455  | 12.10           |
| H(6)  | 0.8601 | 0.1205  | 0.3762  | 12.11           |
| H(7)  | 0.7766 | 0.3214  | 0.5509  | 8.15            |
| H(8)  | 0.8484 | 0.2382  | 0.5693  | 8.15            |
| H(9)  | 0.8330 | 0.3314  | 0.5075  | 8.15            |
| H(10) | 0.5613 | 0.2205  | 0.4609  | 11.48           |
| H(11) | 0.6470 | 0.2311  | 0.5400  | 11.48           |
| H(12) | 0.6158 | 0.3241  | 0.4761  | 11.48           |
| H(13) | 0.5383 | 0.0040  | 0.3103  | 10.90           |
| H(14) | 0.5329 | 0.0374  | 0.3890  | 10.90           |
| H(15) | 0.5002 | 0.1153  | 0.3145  | 10.90           |
| H(16) | 0.3384 | 0.2618  | -0.0608 | 7.41            |
| H(17) | 0.3368 | 0.1511  | -0.0218 | 7.41            |
| H(18) | 0.3666 | 0.2540  | 0.0325  | 7.41            |
| H(19) | 0.4867 | 0.3013  | -0.1490 | 7.42            |
| H(20) | 0.3998 | 0.2533  | -0.1649 | 7.42            |
| H(21) | 0.4316 | 0.3604  | -0.1162 | 7.42            |
| H(22) | 0.6907 | 0.1593  | -0.0104 | 8.79            |
| H(23) | 0.6152 | 0.1671  | -0.0981 | 8.79            |
| H(24) | 0.6533 | 0.2714  | -0.0473 | 8.79            |
| H(25) | 0.6576 | 0.0201  | 0.1512  | 7.00            |
| H(26) | 0.6715 | 0.0006  | 0.0750  | 7.01            |
| H(27) | 0.7138 | 0.0989  | 0.1318  | 7.01            |
| H(28) | 0.4395 | 0.0870  | 0.1186  | 8.42            |
| H(29) | 0.5015 | -0.0040 | 0.1229  | 8.41            |
| H(30) | 0.5349 | 0.0949  | 0.1812  | 8.41            |

|       |        |        |        |      |
|-------|--------|--------|--------|------|
| H(31) | 0.7444 | 0.5223 | 0.4288 | 8.69 |
| H(32) | 0.7075 | 0.5857 | 0.3468 | 8.69 |
| H(33) | 0.6496 | 0.5091 | 0.3655 | 8.69 |
| H(34) | 0.8680 | 0.3959 | 0.3398 | 6.88 |
| H(35) | 0.8650 | 0.4834 | 0.3989 | 6.88 |
| H(36) | 0.8676 | 0.3618 | 0.4207 | 6.88 |
| H(37) | 0.7523 | 0.5187 | 0.2336 | 4.02 |
| H(38) | 0.6561 | 0.5077 | 0.2062 | 4.02 |
| H(39) | 0.8099 | 0.2873 | 0.1412 | 5.84 |
| H(40) | 0.8360 | 0.3313 | 0.2286 | 5.85 |
| H(41) | 0.7802 | 0.2283 | 0.1978 | 5.85 |
| H(42) | 0.7003 | 0.5388 | 0.0796 | 6.57 |
| H(43) | 0.7782 | 0.4687 | 0.0933 | 6.58 |
| H(44) | 0.6897 | 0.4434 | 0.0209 | 6.58 |
| H(45) | 0.5307 | 0.3463 | 0.3425 | 5.38 |
| H(46) | 0.4083 | 0.4495 | 0.2746 | 6.12 |
| H(47) | 0.3682 | 0.5019 | 0.1395 | 4.33 |
| H(48) | 0.4407 | 0.4392 | 0.0742 | 4.06 |

$$B_{eq} = \frac{8}{3} \pi^2 (U_{11}(aa^*)^2 + U_{22}(bb^*)^2 + U_{33}(cc^*)^2 + 2U_{12}(aa^*bb^*)\cos \gamma + 2U_{13}(aa^*cc^*)\cos \beta + 2U_{23}(bb^*cc^*)\cos \alpha)$$

Table 3. Anisotropic displacement parameters

| atom  | U <sub>11</sub> | U <sub>22</sub> | U <sub>33</sub> | U <sub>12</sub> | U <sub>13</sub> | U <sub>23</sub> |
|-------|-----------------|-----------------|-----------------|-----------------|-----------------|-----------------|
| Ir(1) | 0.03595(19)     | 0.0332(2)       | 0.03372(18)     | 0.00048(15)     | 0.02045(14)     | 0.00167(15)     |
| Ir(2) | 0.03759(19)     | 0.02815(18)     | 0.03469(18)     | 0.00040(16)     | 0.01904(14)     | -0.00385(15)    |
| S(1)  | 0.075(2)        | 0.083(2)        | 0.0586(18)      | 0.0338(18)      | 0.0274(16)      | -0.0028(17)     |
| P(1)  | 0.0476(13)      | 0.0419(14)      | 0.0396(12)      | -0.0126(11)     | 0.0227(10)      | -0.0059(11)     |
| P(2)  | 0.0411(12)      | 0.0347(13)      | 0.0429(12)      | -0.0062(10)     | 0.0238(10)      | 0.0002(10)      |
| F(1)  | 0.078(6)        | 0.189(12)       | 0.135(8)        | 0.009(6)        | 0.060(6)        | -0.033(7)       |
| F(2)  | 0.141(8)        | 0.126(8)        | 0.091(6)        | 0.049(7)        | 0.023(6)        | 0.024(6)        |
| F(3)  | 0.105(6)        | 0.116(8)        | 0.126(8)        | -0.025(6)       | 0.049(6)        | -0.048(6)       |
| O(1)  | 0.254(16)       | 0.140(11)       | 0.136(10)       | 0.113(12)       | 0.145(11)       | 0.090(9)        |
| O(2)  | 0.087(7)        | 0.130(10)       | 0.100(7)        | 0.039(7)        | 0.009(6)        | -0.059(7)       |
| O(3)  | 0.094(7)        | 0.106(8)        | 0.113(8)        | 0.030(6)        | 0.061(7)        | 0.003(6)        |
| N(1)  | 0.035(3)        | 0.027(3)        | 0.036(3)        | 0.003(3)        | 0.020(3)        | -0.000(3)       |
| C(1)  | 0.106(9)        | 0.038(6)        | 0.047(5)        | 0.017(6)        | 0.044(6)        | 0.013(4)        |
| C(2)  | 0.057(6)        | 0.070(8)        | 0.046(5)        | 0.024(5)        | 0.027(5)        | 0.025(5)        |
| C(3)  | 0.062(6)        | 0.067(7)        | 0.036(5)        | 0.013(5)        | 0.022(4)        | 0.010(4)        |
| C(4)  | 0.088(8)        | 0.081(8)        | 0.048(6)        | 0.017(7)        | 0.051(6)        | 0.024(6)        |
| C(5)  | 0.063(7)        | 0.070(8)        | 0.050(6)        | -0.004(6)       | 0.023(5)        | 0.010(5)        |
| C(6)  | 0.28(2)         | 0.058(9)        | 0.085(10)       | 0.059(13)       | 0.088(13)       | 0.026(8)        |
| C(7)  | 0.076(9)        | 0.18(2)         | 0.128(13)       | 0.061(11)       | 0.062(9)        | 0.075(13)       |
| C(8)  | 0.100(11)       | 0.123(14)       | 0.035(5)        | -0.025(9)       | 0.015(6)        | 0.006(6)        |
| C(9)  | 0.152(16)       | 0.143(16)       | 0.068(9)        | 0.081(13)       | 0.077(10)       | 0.047(9)        |
| C(10) | 0.103(11)       | 0.145(17)       | 0.097(11)       | -0.063(11)      | 0.026(9)        | 0.053(11)       |
| C(11) | 0.049(5)        | 0.056(6)        | 0.053(5)        | -0.006(5)       | 0.020(4)        | -0.032(5)       |
| C(12) | 0.067(6)        | 0.043(6)        | 0.033(4)        | -0.003(4)       | 0.020(4)        | -0.008(4)       |
| C(13) | 0.058(6)        | 0.062(7)        | 0.052(5)        | -0.014(5)       | 0.031(5)        | -0.027(5)       |
| C(14) | 0.057(5)        | 0.024(4)        | 0.051(5)        | 0.004(4)        | 0.025(4)        | -0.011(4)       |
| C(15) | 0.061(6)        | 0.023(4)        | 0.052(5)        | -0.014(4)       | 0.027(4)        | -0.014(4)       |
| C(16) | 0.046(6)        | 0.088(10)       | 0.101(10)       | -0.008(6)       | 0.031(6)        | -0.043(8)       |
| C(17) | 0.100(11)       | 0.075(9)        | 0.060(7)        | -0.004(8)       | 0.018(7)        | 0.002(7)        |
| C(18) | 0.092(10)       | 0.096(11)       | 0.090(10)       | -0.029(8)       | 0.067(8)        | -0.041(8)       |



|       |           |           |           |           |          |           |
|-------|-----------|-----------|-----------|-----------|----------|-----------|
| C(19) | 0.083(9)  | 0.049(7)  | 0.089(9)  | 0.012(6)  | 0.024(7) | -0.024(6) |
| C(20) | 0.118(12) | 0.069(9)  | 0.079(8)  | -0.026(8) | 0.058(8) | -0.015(7) |
| C(21) | 0.133(12) | 0.058(7)  | 0.083(8)  | -0.039(8) | 0.077(9) | -0.043(7) |
| C(22) | 0.068(7)  | 0.098(10) | 0.052(6)  | -0.039(7) | 0.017(5) | 0.005(6)  |
| C(23) | 0.054(5)  | 0.030(4)  | 0.043(4)  | -0.009(4) | 0.018(4) | 0.001(4)  |
| C(24) | 0.043(5)  | 0.070(8)  | 0.073(7)  | -0.001(5) | 0.031(5) | -0.003(6) |
| C(25) | 0.088(8)  | 0.067(8)  | 0.054(6)  | -0.038(6) | 0.039(6) | -0.004(5) |
| C(26) | 0.041(4)  | 0.029(4)  | 0.036(4)  | -0.006(3) | 0.017(3) | -0.008(3) |
| C(27) | 0.054(5)  | 0.056(6)  | 0.061(6)  | 0.013(5)  | 0.043(5) | 0.005(5)  |
| C(28) | 0.064(6)  | 0.051(6)  | 0.079(7)  | 0.002(5)  | 0.054(6) | -0.006(5) |
| C(29) | 0.039(4)  | 0.036(5)  | 0.062(6)  | 0.008(4)  | 0.025(4) | 0.000(4)  |
| C(30) | 0.040(4)  | 0.041(5)  | 0.047(5)  | 0.010(4)  | 0.017(4) | -0.005(4) |
| C(31) | 0.075(8)  | 0.073(10) | 0.087(10) | -0.000(7) | 0.033(8) | -0.020(8) |

The general temperature factor expression:  $\exp(-2\pi^2(a^2U_{11}h^2 + b^2U_{22}k^2 + c^2U_{33}l^2 + 2a*b*U_{12}hk + 2a*c*U_{13}hl + 2b*c*U_{23}kl))$

Table 4. Bond lengths (Å)

| atom  | atom  | distance  | atom  | atom  | distance  |
|-------|-------|-----------|-------|-------|-----------|
| Ir(1) | P(1)  | 2.240(2)  | Ir(1) | C(1)  | 2.266(11) |
| Ir(1) | C(2)  | 2.259(10) | Ir(1) | C(3)  | 2.290(9)  |
| Ir(1) | C(4)  | 2.290(14) | Ir(1) | C(5)  | 2.293(14) |
| Ir(1) | C(26) | 2.054(8)  | Ir(2) | P(2)  | 2.247(2)  |
| Ir(2) | N(1)  | 2.159(8)  | Ir(2) | C(11) | 2.245(10) |
| Ir(2) | C(12) | 2.203(8)  | Ir(2) | C(13) | 2.182(13) |
| Ir(2) | C(14) | 2.303(9)  | Ir(2) | C(15) | 2.265(9)  |
| S(1)  | O(1)  | 1.473(16) | S(1)  | O(2)  | 1.381(12) |
| S(1)  | O(3)  | 1.435(16) | S(1)  | C(31) | 1.782(14) |
| P(1)  | C(21) | 1.820(14) | P(1)  | C(22) | 1.815(11) |
| P(1)  | C(23) | 1.828(10) | P(2)  | C(23) | 1.836(10) |
| P(2)  | C(24) | 1.797(11) | P(2)  | C(25) | 1.822(14) |
| F(1)  | C(31) | 1.31(2)   | F(2)  | C(31) | 1.35(2)   |
| F(3)  | C(31) | 1.344(19) | N(1)  | C(26) | 1.364(11) |
| N(1)  | C(30) | 1.385(11) | C(1)  | C(2)  | 1.406(15) |
| C(1)  | C(5)  | 1.43(2)   | C(1)  | C(6)  | 1.54(2)   |
| C(2)  | C(3)  | 1.395(19) | C(2)  | C(7)  | 1.50(2)   |
| C(3)  | C(4)  | 1.419(19) | C(3)  | C(8)  | 1.523(16) |
| C(4)  | C(5)  | 1.428(17) | C(4)  | C(9)  | 1.53(2)   |
| C(5)  | C(10) | 1.47(2)   | C(11) | C(12) | 1.379(19) |
| C(11) | C(15) | 1.456(13) | C(11) | C(16) | 1.488(18) |
| C(12) | C(13) | 1.483(16) | C(12) | C(17) | 1.519(15) |
| C(13) | C(14) | 1.475(16) | C(13) | C(18) | 1.50(2)   |
| C(14) | C(15) | 1.380(18) | C(14) | C(19) | 1.459(14) |
| C(15) | C(20) | 1.52(2)   | C(26) | C(27) | 1.411(18) |
| C(27) | C(28) | 1.380(14) | C(28) | C(29) | 1.372(16) |
| C(29) | C(30) | 1.335(18) |       |       |           |

Table 5. Bond lengths involving hydrogens (Å)

| atom  | atom  | distance | atom  | atom  | distance |
|-------|-------|----------|-------|-------|----------|
| C(6)  | H(1)  | 0.950    | C(6)  | H(2)  | 0.950    |
| C(6)  | H(3)  | 0.950    | C(7)  | H(4)  | 0.950    |
| C(7)  | H(5)  | 0.950    | C(7)  | H(6)  | 0.950    |
| C(8)  | H(7)  | 0.950    | C(8)  | H(8)  | 0.950    |
| C(8)  | H(9)  | 0.950    | C(9)  | H(10) | 0.950    |
| C(9)  | H(11) | 0.950    | C(9)  | H(12) | 0.950    |
| C(10) | H(13) | 0.950    | C(10) | H(14) | 0.950    |
| C(10) | H(15) | 0.950    | C(16) | H(16) | 0.950    |
| C(16) | H(17) | 0.950    | C(16) | H(18) | 0.950    |
| C(17) | H(19) | 0.950    | C(17) | H(20) | 0.950    |
| C(17) | H(21) | 0.950    | C(18) | H(22) | 0.950    |
| C(18) | H(23) | 0.950    | C(18) | H(24) | 0.950    |
| C(19) | H(25) | 0.950    | C(19) | H(26) | 0.950    |
| C(19) | H(27) | 0.950    | C(20) | H(28) | 0.950    |
| C(20) | H(29) | 0.950    | C(20) | H(30) | 0.950    |
| C(21) | H(31) | 0.950    | C(21) | H(32) | 0.950    |
| C(21) | H(33) | 0.950    | C(22) | H(34) | 0.950    |
| C(22) | H(35) | 0.950    | C(22) | H(36) | 0.950    |
| C(23) | H(37) | 0.950    | C(23) | H(38) | 0.950    |
| C(24) | H(39) | 0.950    | C(24) | H(40) | 0.950    |
| C(24) | H(41) | 0.950    | C(25) | H(42) | 0.950    |
| C(25) | H(43) | 0.950    | C(25) | H(44) | 0.950    |
| C(27) | H(45) | 0.950    | C(28) | H(46) | 0.950    |
| C(29) | H(47) | 0.950    | C(30) | H(48) | 0.950    |

Table 6. Bond angles (°)

| atom  | atom  | atom  | angle    | atom  | atom  | atom  | angle     |
|-------|-------|-------|----------|-------|-------|-------|-----------|
| P(1)  | Ir(1) | C(1)  | 144.5(3) | P(1)  | Ir(1) | C(2)  | 109.4(3)  |
| P(1)  | Ir(1) | C(3)  | 98.3(3)  | P(1)  | Ir(1) | C(4)  | 119.4(3)  |
| P(1)  | Ir(1) | C(5)  | 155.6(3) | P(1)  | Ir(1) | C(26) | 84.1(2)   |
| C(1)  | Ir(1) | C(2)  | 36.2(4)  | C(1)  | Ir(1) | C(3)  | 59.3(4)   |
| C(1)  | Ir(1) | C(4)  | 59.8(5)  | C(1)  | Ir(1) | C(5)  | 36.5(5)   |
| C(1)  | Ir(1) | C(26) | 131.3(4) | C(2)  | Ir(1) | C(3)  | 35.7(4)   |
| C(2)  | Ir(1) | C(4)  | 60.4(5)  | C(2)  | Ir(1) | C(5)  | 61.4(4)   |
| C(2)  | Ir(1) | C(26) | 164.2(4) | C(3)  | Ir(1) | C(4)  | 36.1(4)   |
| C(3)  | Ir(1) | C(5)  | 60.5(4)  | C(3)  | Ir(1) | C(26) | 136.9(4)  |
| C(4)  | Ir(1) | C(5)  | 36.3(4)  | C(4)  | Ir(1) | C(26) | 106.3(4)  |
| C(5)  | Ir(1) | C(26) | 103.0(4) | P(2)  | Ir(2) | N(1)  | 94.23(19) |
| P(2)  | Ir(2) | C(11) | 166.7(3) | P(2)  | Ir(2) | C(12) | 133.4(3)  |
| P(2)  | Ir(2) | C(13) | 103.4(3) | P(2)  | Ir(2) | C(14) | 107.4(2)  |
| P(2)  | Ir(2) | C(15) | 136.9(2) | N(1)  | Ir(2) | C(11) | 98.5(4)   |
| N(1)  | Ir(2) | C(12) | 130.1(4) | N(1)  | Ir(2) | C(13) | 157.8(4)  |
| N(1)  | Ir(2) | C(14) | 123.2(3) | N(1)  | Ir(2) | C(15) | 96.0(4)   |
| C(11) | Ir(2) | C(12) | 36.1(5)  | C(11) | Ir(2) | C(13) | 63.3(4)   |
| C(11) | Ir(2) | C(14) | 62.0(3)  | C(11) | Ir(2) | C(15) | 37.7(3)   |
| C(12) | Ir(2) | C(13) | 39.5(4)  | C(12) | Ir(2) | C(14) | 63.4(3)   |
| C(12) | Ir(2) | C(15) | 61.5(3)  | C(13) | Ir(2) | C(14) | 38.3(4)   |
| C(13) | Ir(2) | C(15) | 61.8(4)  | C(14) | Ir(2) | C(15) | 35.2(4)   |
| O(1)  | S(1)  | O(2)  | 114.1(8) | O(1)  | S(1)  | O(3)  | 112.9(8)  |
| O(1)  | S(1)  | C(31) | 99.2(8)  | O(2)  | S(1)  | O(3)  | 120.3(7)  |
| O(2)  | S(1)  | C(31) | 102.7(7) | O(3)  | S(1)  | C(31) | 103.9(8)  |
| Ir(1) | P(1)  | C(21) | 115.9(5) | Ir(1) | P(1)  | C(22) | 116.7(4)  |
| Ir(1) | P(1)  | C(23) | 117.8(2) | C(21) | P(1)  | C(22) | 100.9(6)  |
| C(21) | P(1)  | C(23) | 100.5(5) | C(22) | P(1)  | C(23) | 102.3(5)  |
| Ir(2) | P(2)  | C(23) | 112.9(3) | Ir(2) | P(2)  | C(24) | 120.7(4)  |
| Ir(2) | P(2)  | C(25) | 113.4(3) | C(23) | P(2)  | C(24) | 106.6(4)  |
| C(23) | P(2)  | C(25) | 101.4(5) | C(24) | P(2)  | C(25) | 99.5(6)   |

|       |       |       |           |       |       |       |           |
|-------|-------|-------|-----------|-------|-------|-------|-----------|
| Ir(2) | N(1)  | C(26) | 130.5(6)  | Ir(2) | N(1)  | C(30) | 109.9(6)  |
| C(26) | N(1)  | C(30) | 119.4(9)  | Ir(1) | C(1)  | C(2)  | 71.6(6)   |
| Ir(1) | C(1)  | C(5)  | 72.8(7)   | Ir(1) | C(1)  | C(6)  | 129.1(9)  |
| C(2)  | C(1)  | C(5)  | 110.1(11) | C(2)  | C(1)  | C(6)  | 123.1(15) |
| C(5)  | C(1)  | C(6)  | 126.2(13) | Ir(1) | C(2)  | C(1)  | 72.2(5)   |
| Ir(1) | C(2)  | C(3)  | 73.4(6)   | Ir(1) | C(2)  | C(7)  | 129.2(10) |
| C(1)  | C(2)  | C(3)  | 107.2(12) | C(1)  | C(2)  | C(7)  | 125.1(13) |
| C(3)  | C(2)  | C(7)  | 126.6(10) | Ir(1) | C(3)  | C(2)  | 70.9(5)   |
| Ir(1) | C(3)  | C(4)  | 71.9(6)   | Ir(1) | C(3)  | C(8)  | 128.0(9)  |
| C(2)  | C(3)  | C(4)  | 108.9(10) | C(2)  | C(3)  | C(8)  | 127.5(12) |
| C(4)  | C(3)  | C(8)  | 123.4(13) | Ir(1) | C(4)  | C(3)  | 72.0(8)   |
| Ir(1) | C(4)  | C(5)  | 72.0(8)   | Ir(1) | C(4)  | C(9)  | 132.0(9)  |
| C(3)  | C(4)  | C(5)  | 108.4(12) | C(3)  | C(4)  | C(9)  | 123.1(11) |
| C(5)  | C(4)  | C(9)  | 127.2(13) | Ir(1) | C(5)  | C(1)  | 70.7(7)   |
| Ir(1) | C(5)  | C(4)  | 71.7(8)   | Ir(1) | C(5)  | C(10) | 128.8(8)  |
| C(1)  | C(5)  | C(4)  | 105.3(10) | C(1)  | C(5)  | C(10) | 128.3(12) |
| C(4)  | C(5)  | C(10) | 125.7(14) | Ir(2) | C(11) | C(12) | 70.3(5)   |
| Ir(2) | C(11) | C(15) | 71.9(5)   | Ir(2) | C(11) | C(16) | 126.2(9)  |
| C(12) | C(11) | C(15) | 107.3(10) | C(12) | C(11) | C(16) | 128.5(10) |
| C(15) | C(11) | C(16) | 124.1(12) | Ir(2) | C(12) | C(11) | 73.6(5)   |
| Ir(2) | C(12) | C(13) | 69.5(5)   | Ir(2) | C(12) | C(17) | 129.3(8)  |
| C(11) | C(12) | C(13) | 108.6(9)  | C(11) | C(12) | C(17) | 125.4(11) |
| C(13) | C(12) | C(17) | 125.5(13) | Ir(2) | C(13) | C(12) | 71.0(6)   |
| Ir(2) | C(13) | C(14) | 75.3(6)   | Ir(2) | C(13) | C(18) | 127.6(8)  |
| C(12) | C(13) | C(14) | 106.4(11) | C(12) | C(13) | C(18) | 125.8(10) |
| C(14) | C(13) | C(18) | 126.8(10) | Ir(2) | C(14) | C(13) | 66.4(5)   |
| Ir(2) | C(14) | C(15) | 70.9(5)   | Ir(2) | C(14) | C(19) | 127.2(6)  |
| C(13) | C(14) | C(15) | 106.3(8)  | C(13) | C(14) | C(19) | 123.6(12) |
| C(15) | C(14) | C(19) | 130.1(11) | Ir(2) | C(15) | C(11) | 70.4(5)   |
| Ir(2) | C(15) | C(14) | 73.9(5)   | Ir(2) | C(15) | C(20) | 126.1(7)  |
| C(11) | C(15) | C(14) | 111.3(10) | C(11) | C(15) | C(20) | 123.4(11) |
| C(14) | C(15) | C(20) | 125.2(9)  | P(1)  | C(23) | P(2)  | 116.9(4)  |
| Ir(1) | C(26) | N(1)  | 127.3(8)  | Ir(1) | C(26) | C(27) | 116.2(6)  |

|       |       |       |           |       |       |       |           |
|-------|-------|-------|-----------|-------|-------|-------|-----------|
| N(1)  | C(26) | C(27) | 116.4(7)  | C(26) | C(27) | C(28) | 123.5(10) |
| C(27) | C(28) | C(29) | 117.2(12) | C(28) | C(29) | C(30) | 120.0(9)  |
| N(1)  | C(30) | C(29) | 123.2(9)  | S(1)  | C(31) | F(1)  | 113.9(11) |
| S(1)  | C(31) | F(2)  | 110.8(11) | S(1)  | C(31) | F(3)  | 112.0(11) |
| F(1)  | C(31) | F(2)  | 106.9(14) | F(1)  | C(31) | F(3)  | 108.7(14) |
| F(2)  | C(31) | F(3)  | 103.9(13) |       |       |       |           |

Table 7. Bond angles involving hydrogens ( $^{\circ}$ )

| atom  | atom  | atom  | angle | atom  | atom  | atom  | angle |
|-------|-------|-------|-------|-------|-------|-------|-------|
| C(1)  | C(6)  | H(1)  | 110.1 | C(1)  | C(6)  | H(2)  | 109.7 |
| C(1)  | C(6)  | H(3)  | 108.5 | H(1)  | C(6)  | H(2)  | 109.5 |
| H(1)  | C(6)  | H(3)  | 109.5 | H(2)  | C(6)  | H(3)  | 109.5 |
| C(2)  | C(7)  | H(4)  | 108.0 | C(2)  | C(7)  | H(5)  | 110.5 |
| C(2)  | C(7)  | H(6)  | 109.9 | H(4)  | C(7)  | H(5)  | 109.5 |
| H(4)  | C(7)  | H(6)  | 109.5 | H(5)  | C(7)  | H(6)  | 109.5 |
| C(3)  | C(8)  | H(7)  | 111.5 | C(3)  | C(8)  | H(8)  | 107.8 |
| C(3)  | C(8)  | H(9)  | 109.1 | H(7)  | C(8)  | H(8)  | 109.5 |
| H(7)  | C(8)  | H(9)  | 109.5 | H(8)  | C(8)  | H(9)  | 109.5 |
| C(4)  | C(9)  | H(10) | 107.6 | C(4)  | C(9)  | H(11) | 111.3 |
| C(4)  | C(9)  | H(12) | 109.5 | H(10) | C(9)  | H(11) | 109.5 |
| H(10) | C(9)  | H(12) | 109.5 | H(11) | C(9)  | H(12) | 109.5 |
| C(5)  | C(10) | H(13) | 108.4 | C(5)  | C(10) | H(14) | 110.3 |
| C(5)  | C(10) | H(15) | 109.7 | H(13) | C(10) | H(14) | 109.5 |
| H(13) | C(10) | H(15) | 109.5 | H(14) | C(10) | H(15) | 109.5 |
| C(11) | C(16) | H(16) | 108.2 | C(11) | C(16) | H(17) | 109.9 |
| C(11) | C(16) | H(18) | 110.3 | H(16) | C(16) | H(17) | 109.5 |
| H(16) | C(16) | H(18) | 109.5 | H(17) | C(16) | H(18) | 109.5 |
| C(12) | C(17) | H(19) | 109.7 | C(12) | C(17) | H(20) | 111.5 |
| C(12) | C(17) | H(21) | 107.2 | H(19) | C(17) | H(20) | 109.5 |
| H(19) | C(17) | H(21) | 109.5 | H(20) | C(17) | H(21) | 109.5 |
| C(13) | C(18) | H(22) | 108.8 | C(13) | C(18) | H(23) | 110.1 |
| C(13) | C(18) | H(24) | 109.5 | H(22) | C(18) | H(23) | 109.5 |
| H(22) | C(18) | H(24) | 109.5 | H(23) | C(18) | H(24) | 109.5 |
| C(14) | C(19) | H(25) | 108.2 | C(14) | C(19) | H(26) | 109.9 |
| C(14) | C(19) | H(27) | 110.3 | H(25) | C(19) | H(26) | 109.5 |
| H(25) | C(19) | H(27) | 109.5 | H(26) | C(19) | H(27) | 109.5 |
| C(15) | C(20) | H(28) | 111.1 | C(15) | C(20) | H(29) | 108.6 |
| C(15) | C(20) | H(30) | 108.6 | H(28) | C(20) | H(29) | 109.5 |
| H(28) | C(20) | H(30) | 109.5 | H(29) | C(20) | H(30) | 109.5 |

|       |       |       |       |       |       |       |       |
|-------|-------|-------|-------|-------|-------|-------|-------|
| P(1)  | C(21) | H(31) | 110.1 | P(1)  | C(21) | H(32) | 109.3 |
| P(1)  | C(21) | H(33) | 109.0 | H(31) | C(21) | H(32) | 109.5 |
| H(31) | C(21) | H(33) | 109.5 | H(32) | C(21) | H(33) | 109.5 |
| P(1)  | C(22) | H(34) | 108.8 | P(1)  | C(22) | H(35) | 109.8 |
| P(1)  | C(22) | H(36) | 109.8 | H(34) | C(22) | H(35) | 109.5 |
| H(34) | C(22) | H(36) | 109.5 | H(35) | C(22) | H(36) | 109.5 |
| P(1)  | C(23) | H(37) | 107.6 | P(1)  | C(23) | H(38) | 107.6 |
| P(2)  | C(23) | H(37) | 107.6 | P(2)  | C(23) | H(38) | 107.6 |
| H(37) | C(23) | H(38) | 109.5 | P(2)  | C(24) | H(39) | 109.7 |
| P(2)  | C(24) | H(40) | 110.2 | P(2)  | C(24) | H(41) | 108.5 |
| H(39) | C(24) | H(40) | 109.5 | H(39) | C(24) | H(41) | 109.5 |
| H(40) | C(24) | H(41) | 109.5 | P(2)  | C(25) | H(42) | 109.5 |
| P(2)  | C(25) | H(43) | 109.2 | P(2)  | C(25) | H(44) | 109.7 |
| H(42) | C(25) | H(43) | 109.5 | H(42) | C(25) | H(44) | 109.5 |
| H(43) | C(25) | H(44) | 109.5 | C(26) | C(27) | H(45) | 118.3 |
| C(28) | C(27) | H(45) | 118.2 | C(27) | C(28) | H(46) | 121.6 |
| C(29) | C(28) | H(46) | 121.2 | C(28) | C(29) | H(47) | 119.9 |
| C(30) | C(29) | H(47) | 120.0 | N(1)  | C(30) | H(48) | 118.1 |
| C(29) | C(30) | H(48) | 118.7 |       |       |       |       |
